# Supplementary material for: From isoxazolidines to tetrahydro-1,3-oxazines for the synthesis of chiral pyrrolidines
Source: Royal Society of Chemistry journal article supplement (doi:10.1039/c2ra22110a), 2012-01-01
Supplement: c2ra22110a.pdf [file c2ra22110a.pdf]

## ***Electronic Supplementary Information***

### **New rearrangement of isoxazolidines to tetrahydro-1,3-oxazines for the synthesis of chiral pyrrolidines**

**MariFe Flores,<sup>a</sup> Pilar García-García,<sup>b</sup> Narciso M. Garrido,<sup>a</sup> Isidro S. Marcos,  
<sup>a</sup> Francisca Sanz,<sup>c</sup> and David Diez<sup>a\*</sup>**

<sup>a</sup> *Departamento Química Orgánica, Facultad de Ciencias Químicas, Universidad de Salamanca, Salamanca, Spain. Fax: 0034923294574; Tel: 0034923294474; E-mail: [ddm@usal.es](mailto:ddm@usal.es)*

<sup>b</sup> *Instituto de Tecnología Química (UPV-CSIC), Universidad Politécnica de Valencia-Consejo Superior de Investigaciones Científicas, Av. De los Naranjos s/n, 46022 Valencia, Spain*

<sup>c</sup> *Servicio de Difracción de Rayos X, Universidad de Salamanca, Salamanca, Spain.*

| <b>Table of contents</b>                                                                   | <b>Page</b> |
|--------------------------------------------------------------------------------------------|-------------|
| <b>1. General Experimental.....</b>                                                        | <b>2</b>    |
| <b>2. N-O cleavage of Isoxazolidines using Mo(CO)<sub>6</sub>: Standard Procedure.....</b> | <b>2</b>    |
| <b>3. Alkylation of Heterocycles: Standard Procedure.....</b>                              | <b>2</b>    |
| <b>4. Addition of Organometallic Reagents: Standard Procedure.....</b>                     | <b>2</b>    |
| <b>5. Experimental Procedures.....</b>                                                     | <b>3</b>    |
| <b>6. Spectroscopy.....</b>                                                                | <b>9</b>    |
| <b>7. X-Ray of 13a.....</b>                                                                | <b>41</b>   |

## General Experimental

Unless otherwise stated, all chemicals were purchased as the highest purity commercially available and were used without further purification. IR spectra were recorded on a BOMEM 100 FT-IR or an AVATAR 370 FT-IR Thermo Nicolet spectrophotometers.  $^1\text{H}$  and  $^{13}\text{C}$  NMR spectra were performed in  $\text{CDCl}_3$  and referenced to the residual peak of  $\text{CHCl}_3$  at  $\delta$  7.26 ppm and  $\delta$  77.0 ppm, for  $^1\text{H}$  and  $^{13}\text{C}$ , respectively, using Varian 200 VX and Bruker DRX 400 instruments. Chemical shifts are reported in  $\delta$  ppm and coupling constants ( $J$ ) are given in hertz. MS were performed at a VG-TS 250 spectrometer at 70 eV ionising voltage. Mass spectra are presented as  $m/z$  (% rel int.). HRMS were recorded on a VG Platform (Fisons) spectrometer using chemical ionisation (ammonia as gas) or Fast Atom Bombardment (FAB) technique. For some of the samples, QSTAR XL spectrometer was employed for electrospray ionisation (ESI). Optical rotations were determined on a Perkin-Elmer 241 polarimeter in 1 dm cell. Dichloromethane was distilled from calcium hydride; tetrahydrofuran and diethyl ether were distilled from sodium/benzophenone ketyl under argon atmosphere prior to use. Hexane was distilled prior to use.

### N-O cleavage of Isoxazolidines using $\text{Mo}(\text{CO})_6$ : Standard Procedure.

To a stirred solution of isoxazolidine (1 mmol) in 1 mL of  $\text{H}_2\text{O}$  and 15 mL of MeCN was added 0.7 mmol of  $\text{Mo}(\text{CO})_6$  and heated at reflux. The solution was stirred for 24 h. Then it was concentrated *in vacuo*. The resulting crude residue was purified by flash chromatography (silica gel, hexane/EtOAc 1:1) to obtain rearranged compound.

### Alkylation of Heterocycles: Standard Procedure.

To a stirred solution of isoxazolidine (1 mmol) in  $\text{CHCl}_3$  (0.06M) was added dropwise RBr (1 mmol) and heated at 60°C. The solution was stirred at 60 °C for 20 h. Then it was quenched with saturated aqueous solution of  $\text{NH}_4\text{Cl}$  and the product was extracted with DCM (3x15 mL). The combined organic layers were washed with brine, dried ( $\text{Na}_2\text{SO}_4$ ), filtered, and concentrated *in vacuo*. The resulting crude residue was purified by flash chromatography (silica gel, hexane/EtOAc 8:2) to obtain rearranged compound.

### Addition of Organometallic Reagents: Standard Procedure.

To a stirred solution of Rearranged compound (1 mmol) in  $\text{Et}_2\text{O}$  (0.08M) was added dropwise  $\text{RMgBr}$  (10 mmol) at -60°C. The solution was stirred at -60 °C for 2 h. Then the mixture was allowed to warm slowly to room temperature. It was quenched with saturated aqueous solution of  $\text{NH}_4\text{Cl}$  and the product was extracted with DCM (3x15 mL). The combined organic layers were washed with brine, dried ( $\text{Na}_2\text{SO}_4$ ), filtered, and concentrated *in vacuo*. The resulting crude residue was purified by flash chromatography (silica gel, hexane/EtOAc 1:1) to obtain pyrrolidines.

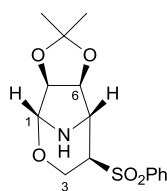

**10**

**(1R,4R,5R,6S,7S)-4-phenylsulfonyl-6,7-isopropilidendioxi-2-oxa-8-azabicyclo[3.2.1]octane**

**10.**

To a stirred solution of isoxazolidine **2c** (460 mg, 1.42 mmol) in 1.50 mL of H<sub>2</sub>O and 21 mL of MeCN was added 265 mg (1 mmol) of Mo(CO)<sub>6</sub> and heated at 80°C. The solution was stirred for 24 h. Then it was concentrated *in vacuo*. The resulting crude residue was purified by flash chromatography (silica gel, hexane/EtOAc 8:2) to obtain **10** (232 mg, 50%) and **4c** (232 mg, 50%). [ $\alpha$ ]<sub>D</sub><sup>20</sup> = -2.7 (c=0.7, CHCl<sub>3</sub>); IR (film): 2981.95, 2933.73, 2881.65, 1301.41, 1147.65, 732.95 cm<sup>-1</sup>; <sup>1</sup>H NMR (200 MHz, CDCl<sub>3</sub>)  $\delta$  7.94 (2H, d, *J* = 8.0 Hz, H<sub>ortho</sub>), 7.70-7.56 (3H, m, H<sub>meta</sub> and H<sub>para</sub>), 4.86 (1H, s, H-1), 4.75 (1H, dd, *J* = 1.2 and 5.4 Hz, H-6), 4.55-4.48 (2H, m, H-7 and H<sub>B-3</sub>), 3.87 (1H, dd, *J* = 5.8 and 14.2 Hz, H<sub>A-3</sub>), 3.77 (1H, sa, H-5), 2.73 (1H, dd, *J* = 3.0 and 5.8 Hz, H-4), 1.45 (3H, s, Me-acetonide), 1.31 (3H, s, Me acetonide); <sup>13</sup>C NMR (50 MHz, CDCl<sub>3</sub>)  $\delta$  137.5, 134.6, 129.8, 128.9, 112.9, 88.8, 81.9, 78.7, 59.1, 57.9, 56.5, 26.1, 24.9; HRMS (EI) calcd for C<sub>15</sub>H<sub>20</sub>NO<sub>5</sub>S requires (M+H)<sup>+</sup> 326.1056; found 326.1068.

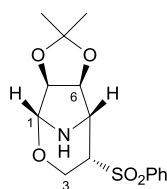

**11**

**(1R,4S,5R,6S,7S)-4-phenylsulfonyl-6,7-isopropilidendioxi-2-oxa-8-azabicyclo[3.2.1]octane**

**11.**

To a stirred solution of isoxazolidine **3c** (530 mg, 1.63 mmol) in 1.70 mL of H<sub>2</sub>O and 25 mL of MeCN was added 300 mg (1.14 mmol) of Mo(CO)<sub>6</sub> and heated at 80°C. The solution was stirred for 24 h. Then it was concentrated *in vacuo*. The resulting crude residue was purified by flash chromatography (silica gel, hexane/EtOAc 8:2) to obtain **11** (282 mg, 53%) and **5c** (105 mg, 20%). [ $\alpha$ ]<sub>D</sub><sup>20</sup> = +20.0 (c=0.9, CHCl<sub>3</sub>); IR (film): 3412, 3338, 2974, 2929, 1373, 1140, 1033 cm<sup>-1</sup>; <sup>1</sup>H NMR (400 MHz, CDCl<sub>3</sub>)  $\delta$  7.82 (2H, d, *J* = 8.0 Hz, H<sub>ortho</sub>), 7.70 (1H, t, *J* = 7.6 Hz, H<sub>para</sub>), 7.60 (2H, d, *J* = 7.6 Hz, H<sub>meta</sub>), 5.32 (1H, d, *J* = 5.4 Hz, H-6), 4.77 (1H, s, H-1), 4.72 (1H, d, *J* = 5.4 Hz, H-7), 4.01 (1H, dd, *J* = 5.8 and 11.8 Hz, H<sub>B-3</sub>), 3.87 (1H, t, *J* = 11.8 Hz, H<sub>A-3</sub>), 3.77 (1H, sa, H-5), 3.50 (1H, ddd, *J* = 2.6, 5.8 and 8.4 Hz, H-4), 1.45 (3H, s, Me-acetonide), 1.38 (3H, s, Me acetonide); <sup>13</sup>C NMR (100 MHz, CDCl<sub>3</sub>)  $\delta$  137.7, 134.4, 129.6, 128.2, 111.7, 88.8, 81.8, 78.7, 61.3, 59.6, 57.9, 25.7, 24.4; HRMS (EI) calcd for C<sub>15</sub>H<sub>20</sub>NO<sub>5</sub>S requires (M+H)<sup>+</sup> 326.1056; found 326.1068.

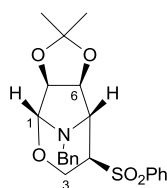

**12a**

**(1R,4R,5R,6S,7S)-8-benzyl-4-phenylsulfonyl-6,7-isopropilidendioxi-2-oxa-8-azabicyclo[3.2.1]octane 12a.**

To a stirred solution of isoxazolidine **2c** (37.40 mg, 0.11 mmol) in CHCl<sub>3</sub> (1.50 mL) was added dropwise BnBr (13.6  $\mu$ L, 0.11 mmol) and heated at 60°C. The solution was stirred at 60 °C for 20 h. Then it was quenched with saturated aqueous solution of NH<sub>4</sub>Cl and the product was extracted with DCM (3x15 mL). The combined organic layers were washed with brine, dried (Na<sub>2</sub>SO<sub>4</sub>), filtered, and concentrated *in vacuo*. The resulting crude residue was purified by flash chromatography (silica gel, hexane/EtOAc 8:2) to obtain **12a** (21.7 mg, 46%). [ $\alpha$ ]<sub>D</sub><sup>20</sup> = -31.7 (c=0.6, CHCl<sub>3</sub>); IR (film): 3391, 3060, 2970, 2921, 1446, 1385, 1152 cm<sup>-1</sup>; <sup>1</sup>H NMR (200 MHz, CDCl<sub>3</sub>)  $\delta$  7.85-7.30 (10H, m, H<sub>Ar</sub>), 4.71 (1H, s, H-1), 4.62 (1H, d, *J* = 5.0 Hz, H-7), 4.52 (1H, d, *J* = 5.0 Hz, H-6), 4.38 (1H, d, *J* = 12.0 Hz, H<sub>A-1'</sub>), 4.26-4.23 (1H, m, H<sub>A-3</sub>), 4.20 (1H, d, *J* = 12.0 Hz, H<sub>B-1'</sub>), 4.13 (1H, s, H-5), 3.85-3.75 (1H, m, H<sub>B-3</sub>), 3.10 (1H, t, *J* = 6.2 Hz, H-4), 1.52 (3H, s, Me-acetonide), 1.29 (3H, s, Me-acetonide); <sup>13</sup>C NMR (50 MHz, CDCl<sub>3</sub>)  $\delta$  138.9, 138.5, 134.4, 129.8, 128.7, 128.4, 127.3,

113.3, 90.1, 84.6, 83.1, 61.8, 59.6, 58.4, 52.6, 25.9, 24.8; HRMS (EI) calcd for  $C_{22}H_{25}NO_5S$  requires  $(M+H)^+$  416.1526; found 416.1538.

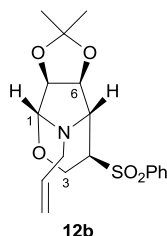

**(1R,4R,5R,6S,7S)-4-phenylsulfonyl-8-propenyl-6,7-isopropylidendioxi-2-oxa-8-azabicyclo[3.2.1]octane 12b.**

To a stirred solution of isoxazolidine **2c** (49.60 mg, 0.15 mmol) in  $CHCl_3$  (2.60 mL) was added dropwise AllylBr (14  $\mu$ L, 0.15 mmol) and heated at 60°C. The solution was stirred at 60 °C for 20 h. Then it was quenched with saturated aqueous solution of  $NH_4Cl$  and the product was extracted with DCM (3x15 mL). The combined organic layers were washed with brine, dried ( $Na_2SO_4$ ), filtered, and concentrated *in vacuo*. The resulting crude residue was purified by flash chromatography (silica gel, hexane/EtOAc 8:2) to obtain **12b** (32.9 mg, 60%).  $[\alpha]_D^{20} = -31.7$  ( $c=0.6$ ,  $CHCl_3$ ); IR (film): 3068.75, 2981.95, 2931.80, 2860.43, 1446.61, 1305.81, 1209.37, 1449.57, 1072.42, 731.02, 605.65  $cm^{-1}$ ;  $^1H$  NMR (200 MHz,  $CDCl_3$ )  $\delta$  7.89 (2H, d,  $J = 8.2$  Hz, *Hortho*), 7.70-7.52 (3H, m, *Hpara* and *Hmeta*), 5.75-5.58 (1H, m, H-2'), 5.31 (1H, dd,  $J = 1.8$  and 13.6 Hz,  $H_A-3'$ ), 5.14 (1H, dd,  $J = 1.8$  and 13.6 Hz,  $H_B-3'$ ), 4.70 (1H, s, H-1), 4.62 (1H, d,  $J = 5.4$  Hz, H-6), 4.51 (1H, d,  $J = 5.4$  Hz, H-7), 4.20-4.09 (2H, m, 2H-3), 4.05 (1H, s, H-5), 3.80-3.55 (2H, m, H-4 and  $H_A-1'$ ), 3.07-3.01 (1H, m,  $H_B-1'$ ), 1.48 (3H, s, Me-acetonide), 1.26 (3H, s, Me-acetonide);  $^{13}C$  NMR (50 MHz,  $CDCl_3$ )  $\delta$  138.7, 135.3, 134.3, 129.7, 128.8, 117.3, 113.4, 90.3, 84.7, 83.5, 62.3, 59.8, 58.4, 51.9, 26.1, 25.0; HRMS (EI) calcd for  $C_{18}H_{24}NO_5S$  requires  $(M+H)^+$  366.1369; found 366.1351.

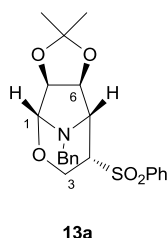

**(1R,4S,5R,6S,7S)-8-benzyl-4-phenylsulfonyl-6,7-isopropylidendioxi-2-oxa-8-azabicyclo[3.2.1]octane 13a.**

To a stirred solution of isoxazolidine **3c** (28.30 mg, 0.09 mmol) in  $CHCl_3$  (1.30 mL) was added dropwise  $BnBr$  (10  $\mu$ L, 0.09 mmol) and heated at 60°C. The solution was stirred at 60 °C for 20 h. Then it was quenched with saturated aqueous solution of  $NH_4Cl$  and the product was extracted with DCM (3x15 mL). The combined organic layers were washed with brine, dried ( $Na_2SO_4$ ), filtered, and concentrated *in vacuo*. The resulting crude residue was purified by flash chromatography (silica gel, hexane/EtOAc 8:2) to obtain **13a** (24 mg, 67%).  $[\alpha]_D^{20} = -28.3$  ( $c=0.7$ ,  $CHCl_3$ ); IR (film): 3387, 2978, 2864, 1589, 1397, 1140  $cm^{-1}$ ;  $^1H$  NMR (200 MHz,  $CDCl_3$ )  $\delta$  7.84-7.52 (10H, m,  $H_{Ar}$ ), 5.34 (1H, d,  $J = 5.8$  Hz, H-6), 4.72 (1H, d,  $J = 5.8$  Hz, H-7), 4.50 (1H, s, H-1), 4.14-3.97 (3H, m,  $CH_2-Bn$  and 1H-3), 3.84 (1H, t,  $J = 14.8$  Hz, H-3), 3.73 (1H, ddd,  $J = 2.6$ , 6.2 and 8.8 Hz, H-4), 3.56 (1H, s, H-5), 1.52 (3H, s, Me-acetonide), 1.37 (3H, s, Me acetonide);  $^{13}C$  NMR (50 MHz,  $CDCl_3$ )  $\delta$  138.1, 137.3, 134.4, 129.8, 128.7, 128.3, 127.5, 112.5, 89.6, 81.4, 77.4, 59.9, 59.8, 54.1, 48.3, 26.4, 25.4; HRMS (EI) calcd for  $C_{22}H_{25}NO_5NaS$  requires  $(M+Na)$  438.1345; found 438.1349.

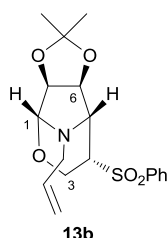

**(1R,4S,5R,6S,7S)-4-phenylsulfonyl-8-propenyl-6,7-isopropylidendioxi-2-oxa-8-azabicyclo[3.2.1]octane 13b.**

To a stirred solution of isoxazolidine **3c** (74 mg, 0.23 mmol) in  $\text{CHCl}_3$  (4 mL) was added dropwise AllylBr (20  $\mu\text{L}$ , 0.23 mmol) and heated at  $60^\circ\text{C}$ . The solution was stirred at  $60^\circ\text{C}$  for 20 h. Then it was quenched with saturated aqueous solution of  $\text{NH}_4\text{Cl}$  and the product was extracted with DCM (3x15 mL). The combined organic layers were washed with brine, dried ( $\text{Na}_2\text{SO}_4$ ), filtered, and concentrated *in vacuo*. The resulting crude residue was purified by flash chromatography (silica gel, hexane/EtOAc 8:2) to obtain **13b** (113 mg, 74%).  $[\alpha]_{\text{D}}^{20} = -13.7$  ( $c=0.6$ ,  $\text{CHCl}_3$ ); IR (film): 3066.82, 2981.95, 2935.66, 1309.67, 1246.02, 1101.35, 902.69, 866.04, 731.02, 603.72  $\text{cm}^{-1}$ ;  $^1\text{H}$  NMR (200 MHz,  $\text{CDCl}_3$ )  $\delta$  7.85 (2H, d,  $J=8.0$  Hz, H<sub>ortho</sub>), 7.72-7.52 (3H, m, H<sub>para</sub> and H<sub>meta</sub>), 5.71-5.63 (1H, m, H-2'), 5.33 (1H, d,  $J=5.4$  Hz, H-6), 5.20 (1H, dd,  $J=1.8$  and 7.2 Hz, H<sub>A</sub>-3'), 5.02 (1H, dd,  $J=1.8$  and 7.2 Hz, H<sub>B</sub>-3'), 4.70 (1H, d,  $J=5.4$  Hz, H-7), 4.51 (1H, s, H-1), 4.02-3.87 (2H, m, 2H-3), 3.60 (1H, s, H-5), 3.59-3.42 (2H, m, H-4 and H<sub>A</sub>-1'), 3.29-3.19 (1H, m, H<sub>B</sub>-1'), 1.45 (3H, s, Me-acetonide), 1.36 (3H, s, Me-acetonide);  $^{13}\text{C}$  NMR (50 MHz,  $\text{CDCl}_3$ )  $\delta$  138.1, 134.5, 134.3, 129.9, 128.4, 117.6, 112.6, 89.5, 81.5, 77.9, 59.9, 59.8, 53.9, 46.9, 26.4, 25.5; HRMS (EI) calcd for  $\text{C}_{18}\text{H}_{24}\text{NO}_5\text{S}$  requires  $(\text{M}+\text{H})^+$  366.1369; found 366.1372.

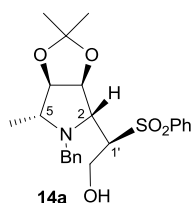

**(1'R,2R,3S,4R,5R)-1-Benzyl-5-methyl-2-(1-phenylsulfonyl-2-hydroxyethyl)-3,4-isopropylidenedioxypyrrolidine 14a.**

To a stirred solution of **12a** (10 mg, 0.023 mmol) in  $\text{Et}_2\text{O}$  (1.0 mL) was added dropwise a 3.0 M  $\text{Et}_2\text{O}$  solution of  $\text{MeMgBr}$  (0.10 mL) at  $-60^\circ\text{C}$ . The solution was stirred at  $-60^\circ\text{C}$  for 2 h. Then the mixture was allowed to warm slowly to room temperature. It was quenched with saturated aqueous solution of  $\text{NH}_4\text{Cl}$  and the product was extracted with DCM (3x15 mL). The combined organic layers were washed with brine, dried ( $\text{Na}_2\text{SO}_4$ ), filtered, and concentrated *in vacuo* to afford **14a** (8.50 mg, 85%).  $[\alpha]_{\text{D}}^{20} = -4.3$  ( $c=0.4$ ,  $\text{CHCl}_3$ ); IR (film): 2958.80, 2920.23, 2850.79, 1143.79, 1051.20, 800.46, 584.43  $\text{cm}^{-1}$ ;  $^1\text{H}$  NMR (200 MHz,  $\text{CDCl}_3$ )  $\delta$  7.92-7.25 (10H, m, H<sub>Ar</sub>), 5.04 (1H, dd,  $J=2.6$  and 6.0 Hz, H-3), 4.35 (1H, dd,  $J=3.2$  and 6.0 Hz, H-4), 4.01 (1H, dd,  $J=4.4$  and 12.0 Hz, H<sub>A</sub>-2'), 3.89 (1H, d,  $J=13.2$  Hz, H<sub>A</sub>-CH<sub>2</sub>Bn), 3.66-3.56 (2H, m, H-2 and H-21), 3.64 (1H, d,  $J=13.2$  Hz, H<sub>B</sub>-CH<sub>2</sub>Bn), 3.42-3.36 (1H, m, H-1'), 3.12 (1H, dq,  $J=3.2$  and 7.0 Hz, H-5), 1.45 (3H, s, Me-acetonide), 1.30 (3H, s, Me-acetonide), 1.20 (3H, d,  $J=7.0$  Hz, Me-C-5);  $^{13}\text{C}$  NMR (50 MHz,  $\text{CDCl}_3$ )  $\delta$  138.0, 135.7, 134.2, 129.8, 129.4, 128.8, 128.7, 127.8, 112.5, 86.4, 84.2, 69.0, 66.9, 64.1, 60.0, 59.4, 27.6, 25.3, 19.8; HRMS (EI) calcd for  $\text{C}_{23}\text{H}_{30}\text{NO}_5\text{NaS}$  requires  $(\text{M}+\text{Na})$  454.1658; found 454.1640.

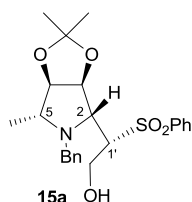

**(1'S,2R,3S,4R,5R)-1-Benzyl-5-methyl-2-(1-phenylsulfonyl-2-hydroxyethyl)-3,4-isopropylidenedioxypyrrolidine 15a.**

To a stirred solution of **13a** (50 mg, 0.12 mmol) in  $\text{Et}_2\text{O}$  (1.50 mL) was added dropwise a 3.0 M  $\text{Et}_2\text{O}$  solution of  $\text{MeMgBr}$  (0.40 mL) at  $-60^\circ\text{C}$ . The solution was stirred at  $-60^\circ\text{C}$  for 2 h. Then the mixture was allowed to warm slowly to room temperature. It was quenched with saturated aqueous solution of  $\text{NH}_4\text{Cl}$  and the product was extracted with DCM (3x15 mL). The combined organic layers were washed with brine, dried ( $\text{Na}_2\text{SO}_4$ ), filtered, and concentrated *in vacuo* to afford **15a** (49 mg, 98%).  $[\alpha]_{\text{D}}^{20} = +5.8$  ( $c=0.7$ ,  $\text{CHCl}_3$ ); IR (film): 3473.80, 2985.81, 2964.59, 2933.73, 1448.54, 1381.03, 1307.74, 1043.49, 690.52  $\text{cm}^{-1}$ ;  $^1\text{H}$  NMR (400 MHz,  $\text{CDCl}_3$ )  $\delta$  7.94-7.55 (10H, m, H<sub>Ar</sub>), 4.76 (1H, d,  $J=6.0$  Hz, H-3), 4.09 (1H, t,  $J=6.5$  Hz, H-4), 4.06 (1H, ddd,  $J=1.0$ , 4.7 and 11.6 Hz, H<sub>A</sub>-2'), 3.96 (1H, dd,  $J=7.5$  and 11.6 Hz, H<sub>B</sub>-2'), 3.82 (1H, d,  $J=13.6$  Hz, H<sub>A</sub>-CH<sub>2</sub>Bn), 3.59 (1H, s, H-2), 3.49 (1H, d,  $J=13.6$  Hz, H<sub>B</sub>-CH<sub>2</sub>Bn), 3.03-2.99 (1H, m, H-1'), 2.70-2.67

(1H, m, H-5), 1.41 (3H, s, Me-acetonide), 1.29 (3H, s, Me-acetonide), 1.20 (3H, d,  $J = 6.0$  Hz, Me-C-5);  $^{13}\text{C}$  NMR (100 MHz,  $\text{CDCl}_3$ )  $\delta$  138.0, 135.7, 133.9, 129.5, 129.2, 128.8, 128.6, 127.7, 112.5, 84.6, 78.6, 65.7, 63.5, 63.3, 58.4, 56.3, 27.9, 25.8, 17.6; HRMS (EI) calcd for  $\text{C}_{23}\text{H}_{30}\text{NO}_5\text{S}$  requires  $(\text{M}+\text{H})^+$  432.1815; found 432.1824.

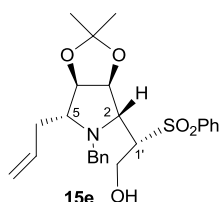

**(1'S,2R,3S,4R,5R)-1-Benzyl-2-(1-phenylsulfonyl-2-hydroxyethyl)-5-propenyl-3,4-isopropylidenedioxypyrrolidine 15e.**

To a stirred solution of **13a** (61.50 mg, 0.15 mmol) in  $\text{Et}_2\text{O}$  (2.20 mL) was added dropwise a 1.0 M  $\text{Et}_2\text{O}$  solution of  $\text{AllylMgBr}$  (1.50 mL) at  $-60^\circ\text{C}$ . The solution was stirred at  $-60^\circ\text{C}$  for 2 h. Then the mixture was allowed to warm slowly to room temperature. It was quenched with saturated aqueous solution of  $\text{NH}_4\text{Cl}$  and the product was extracted with DCM (3x15 mL). The combined organic layers were washed with brine, dried ( $\text{Na}_2\text{SO}_4$ ), filtered, and concentrated *in vacuo* to afford **15e** (58 mg, 85%).  $[\alpha]_{\text{D}}^{20} = +4.3$  ( $c=0.5$ ,  $\text{CHCl}_3$ ); IR (film): 3502.73, 2981.95, 2916.37, 2848.46, 1448.54, 1149.57, 1070.49, 736.81, 590.22  $\text{cm}^{-1}$ ;  $^1\text{H}$  NMR (200 MHz,  $\text{CDCl}_3$ )  $\delta$  7.91-7.24 (10H, m, *Ar*), 5.90-5.76 (1H, m, H-2''), 5.20-5.03 (2H, m, H-3''), 4.78 (1H, dd,  $J = 2.0$  and 6.2 Hz, H-3), 4.31 (1H, t,  $J = 6.2$  Hz, H-4), 4.09-3.98 (2H, m, H-2'), 3.91 (1H, d,  $J = 13.2$  Hz,  $\text{H}_\text{A}$ - $\text{CH}_2\text{Bn}$ ), 3.58 (1H, s, H-2), 3.56 (1H, d,  $J = 13.2$  Hz,  $\text{H}_\text{B}$ - $\text{CH}_2\text{Bn}$ ), 3.09-2.95 (1H, m, H-1'), 2.48-2.16 (3H, m, H-5, H-1''), 1.42 (3H, s, Me-acetonide), 1.29 (3H, s, Me-acetonide);  $^{13}\text{C}$  NMR (50 MHz,  $\text{CDCl}_3$ )  $\delta$  138.8, 138.3, 136.2, 135.7, 134.3, 129.7, 129.4, 129.3, 128.5, 127.3, 118.4, 112.7, 82.4, 79.0, 67.6, 65.4, 64.1, 58.4, 57.1, 36.2, 28.1, 26.0; HRMS (EI) calcd for  $\text{C}_{25}\text{H}_{32}\text{NO}_5\text{S}$  ( $\text{M}+\text{H}$ ) $^+$ , 458.1995.; found 458.1978.

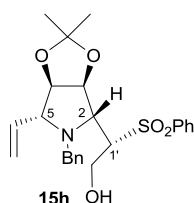

**(1'S,2R,3S,4R,5R)-1-Benzyl-2-(1-phenylsulfonyl-2-hydroxyethyl)-5-vinyl-3,4-isopropylidenedioxypyrrolidine 15h.**

To a stirred solution of **13a** (42 mg, 0.10 mmol) in  $\text{Et}_2\text{O}$  (1.5 mL) was added dropwise a 1.0 M THF solution of  $\text{VinylMgBr}$  (20 mL) at  $-60^\circ\text{C}$ . The solution was stirred at  $-60^\circ\text{C}$  for 2 h. Then the mixture was allowed to warm slowly to room temperature. It was quenched with saturated aqueous solution of  $\text{NH}_4\text{Cl}$  and the product was extracted with DCM (3x15 mL). The combined organic layers were washed with brine, dried ( $\text{Na}_2\text{SO}_4$ ), filtered, and concentrated *in vacuo* to afford **15h** (24 mg, 54%).  $[\alpha]_{\text{D}}^{20} = +40$  ( $c=0.3$ ,  $\text{CHCl}_3$ ); IR (film): 2983.88, 2920.23, 2848.80, 1448.54, 1215.15, 1070.44, 690.52  $\text{cm}^{-1}$ ;  $^1\text{H}$  NMR (200 MHz,  $\text{CDCl}_3$ )  $\delta$  7.97-6.95 (10H, m, *Ar*), 5.79-5.61 (1H, m, H-1''), 5.40-5.29 (2H, m, H-2''), 4.79 (1H, dd,  $J = 1.2$  and 5.6 Hz, H-3), 4.26 (1H, t,  $J = 7.0$  Hz, H-4), 4.07 (1H, dd,  $J = 4.2$  and 11.8 Hz, H-2 $_\text{A}$ '), 3.93 (1H, dd,  $J = 5.8$  and 11.8 Hz, H-2 $_\text{B}$ '), 3.89 (1H, d,  $J = 13.2$  Hz,  $\text{H}_\text{A}$ - $\text{CH}_2\text{Bn}$ ), 3.60 (1H, s, H-2), 3.35 (1H, d,  $J = 13.2$  Hz,  $\text{H}_\text{B}$ - $\text{CH}_2\text{Bn}$ ), 3.08 (1H, t,  $J = 7.8$  Hz, H-1''), 2.93-2.95 (1H, m, H-1'), 1.46 (3H, s, Me-acetonide), 1.30 (3H, s, Me-acetonide);  $^{13}\text{C}$  NMR (50 MHz,  $\text{CDCl}_3$ )  $\delta$  138.2, 137.3, 135.8, 134.4, 129.9, 129.5, 129.2, 128.8, 128.1, 120.1, 112.8, 83.2, 79.3, 72.4, 64.9, 63.7, 58.5, 56.1, 28.2, 26.1; HRMS (EI) calcd for  $\text{C}_{25}\text{H}_{32}\text{NO}_5\text{NaS}$  ( $\text{M}+\text{Na}$ ), 466.1658.; found 466.1660.

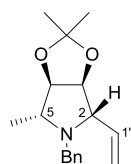

**(2S,3S,4R,5R)-1-Benzyl-3,4-isopropylidenedioxy-5-methyl-2-vinylpyrrolidine 16.**

a) To a solution of pyrrolidine **15a** (40 mg, 0.09 mmol) in  $\text{MeOH}$  (1.5 mL) was added 128 mg (0.28 mmol) of 5%  $\text{Na}$  (Hg) amalgam at r.t. The mixture was stirred for 2 h at this temperature under an

argon atmosphere. Next, it was filtered to eliminate the Hg residue and diluted with DCM, 30mL. The mixture was washed with brine, dried (Na<sub>2</sub>SO<sub>4</sub>), filtered, and concentrated. The resulting crude residue was purified by flash chromatography (silica gel, n-hexane/EtOAc 6:4) to obtain **16** (25 mg, 100%). [ $\alpha$ ]<sub>D</sub><sup>20</sup> = -5.0 (c=0.5, CH<sub>2</sub>Cl<sub>2</sub>); IR (film): 2980.02, 2964.59, 2929.87, 1448.54, 1246.02, 1147.65, 1070.49, 866.04 cm<sup>-1</sup>; <sup>1</sup>H NMR (200 MHz, CDCl<sub>3</sub>)  $\delta$  7.31-7.21 (5H, m, H<sub>Ar</sub>), 5.84-5.66 (1H, m, H-1'), 5.39-5.20 (2H, m, H-2'), 4.29 (1H, dd, *J* = 5.0 and 6.8 Hz, H-3), 4.16 (1H, dd, *J* = 4.8 and 6.8 Hz, H-4), 3.84 (1H, d, *J* = 14.6 Hz, H<sub>A</sub>-CH<sub>2</sub>Bn), 3.57 (1H, d, *J* = 14.6 Hz, H<sub>B</sub>-CH<sub>2</sub>Bn), 3.09 (1H, dd, *J* = 5.0 and 8.4 Hz, H-2), 2.70-2.64 (1H, m, H-5), 1.43 (3H, s, Me-acetonide), 1.29 (3H, s, Me-acetonide), 1.22 (3H, d, *J* = 5.6 Hz, Me-C-5); <sup>13</sup>C NMR (50 MHz, CDCl<sub>3</sub>)  $\delta$  138.8, 137.6, 129.5, 128.2, 127.1, 118.9, 113.5, 85.4, 83.5, 72.9, 63.9, 53.4, 27.5, 25.6, 18.5; HRMS (EI) calcd for C<sub>17</sub>H<sub>24</sub>NO<sub>2</sub> requires (M+H)<sup>+</sup> 274.1801; found 274.1800.

b) To a solution of pyrrolidine **14a** (10 mg, 0.02 mmol) in MeOH (1 mL) was added 48 mg (0.06 mmol) of 5% Na (Hg) amalgam at r.t. The mixture was stirred for 2 h at this temperature under an argon atmosphere. Next, it was filtered to eliminate the Hg residue and diluted with DCM, 30mL. The mixture was washed with brine, dried (Na<sub>2</sub>SO<sub>4</sub>), filtered, and concentrated. The resulting crude residue was purified by flash chromatography (silica gel, n-hexane/EtOAc 6:4) to obtain **16** (6 mg, 100%).

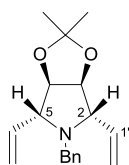

**17**

**(2S,3S,4R,5R)-1-Benzyl-2,5-divinyl-3,4-isopropylidenedioxypyrrolidine 17.**

To a solution of pyrrolidine **15h** (24 mg, 0.06 mmol) in MeOH (1 mL) was added 75 mg (0.16 mmol) of 5% Na (Hg) amalgam at r.t. The mixture was stirred for 2 h at this temperature under an argon atmosphere. Next, it was filtered to eliminate the Hg residue and diluted with DCM, 30mL. The mixture was washed with brine, dried (Na<sub>2</sub>SO<sub>4</sub>), filtered, and concentrated. The resulting crude residue was purified by flash chromatography (silica gel, n-hexane/EtOAc 6:4) to obtain **17** (17 mg, 100%). IR (film): 2981.95, 2924.09, 1375.25, 1267.23, 1072.42, 921.97, 866.04, 704.02 cm<sup>-1</sup>; <sup>1</sup>H NMR (200 MHz, CDCl<sub>3</sub>)  $\delta$  7.26-7.21 (5H, m, H<sub>Ar</sub>), 5.82-5.84 (2H, m, H-1'), 5.38 (2H, d, *J* = 1.8 Hz, H<sub>A</sub>-2'), 5.20 (2H, dd, *J* = 5.0 and 6.8 Hz, H<sub>B</sub>-2'), 4.30 (2H, dd, *J* = 1.2 and 3.0 Hz, H-3 and H-4), 3.70 (2H, bs, CH<sub>2</sub>Bn), 3.12 (2H, dd, *J* = 1.8 and 7.8 Hz, H-2 and H-5), 1.42 (3H, s, Me-acetonide), 1.27 (3H, s, Me-acetonide); <sup>13</sup>C NMR (50 MHz, CDCl<sub>3</sub>)  $\delta$  138.5, 136.5, 130.1, 128.1, 127.1, 118.9, 113.7, 83.7, 77.3, 71.7, 52.6, 27.4, 25.6; HRMS (EI) calcd for C<sub>18</sub>H<sub>24</sub>NO<sub>2</sub> requires (M+H)<sup>+</sup> 286.1803; found 286.1801.

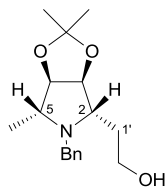

**18**

**(2S,3S,4R,5R)-1-Benzyl-3,4-isopropylidenedioxy-5-methylpyrrolidine-2-ethanol 18.**

9-BBn (1.8 ml, 0.9 mmol) was added to a solution of vinylpyrrolidine **16** (50 mg, 0.18 mmol) in THF (1.50 mL) at 0°C. The reaction mixture was stirred at r.t. for 4h. a saturated aqueous solution of NaBO<sub>3</sub> was added and the resulting mixture was stirred at r.t. for 18h. The reaction product was then extracted with DCM (3x15 mL). The combined organic layers were washed with brine, dried (Na<sub>2</sub>SO<sub>4</sub>), filtered, and concentrated. The resulting crude residue was purified by flash chromatography (silica gel, n-hexane/EtOAc 6:4) to obtain **18** (15 mg, 30%). [ $\alpha$ ]<sub>D</sub><sup>20</sup> = -12.8 (c=0.8, CH<sub>3</sub>Cl); IR (film): 3396.7, 2980.02, 2931.80, 2866.22, 1452.40, 1340.53, 1028.06, 732.95, 702.09 cm<sup>-1</sup>; <sup>1</sup>H NMR (200 MHz, CDCl<sub>3</sub>)  $\delta$  7.33-7.17 (5H, m, H<sub>Ar</sub>), 4.29 (1H, dd, *J* = 5.0 and 6.8 Hz, H-3), 4.16 (1H, dd, *J* = 4.6 and 6.8 Hz, H-4), 4.05-3.99 (1H, m, H<sub>A</sub>-2'), 3.84 (1H, d, *J* = 14.3 Hz, H<sub>A</sub>-CH<sub>2</sub>Bn), 3.59 (1H, d, *J* = 14.3 Hz, H<sub>B</sub>-CH<sub>2</sub>Bn), 3.54-3.40 (1H, m, H<sub>B</sub>-2'), 3.12-3.05 (1H, m,

H-2), 2.70-2.64 (1H, m, H-5), 1.95-1.85 (1H, m, H<sub>A</sub>-1'), 1.83-1.75 (1H, m, H<sub>B</sub>-1'), 1.44 (3H, s, Me-acetonide), 1.29 (3H, s, Me-acetonide), 1.17 (3H, d, *J* = 5.6 Hz, Me-C-5); <sup>13</sup>C NMR (50 MHz, CDCl<sub>3</sub>) δ 135.2, 132.3, 130.4, 128.6, 113.2, 83.5, 81.2, 72.7, 68.663.5, 54.4, 27.6, 24.3, 17.6; HRMS (EI) calcd for C<sub>17</sub>H<sub>26</sub>NO<sub>3</sub> requires (M+H)<sup>+</sup> 292.1907; found 292.1911.

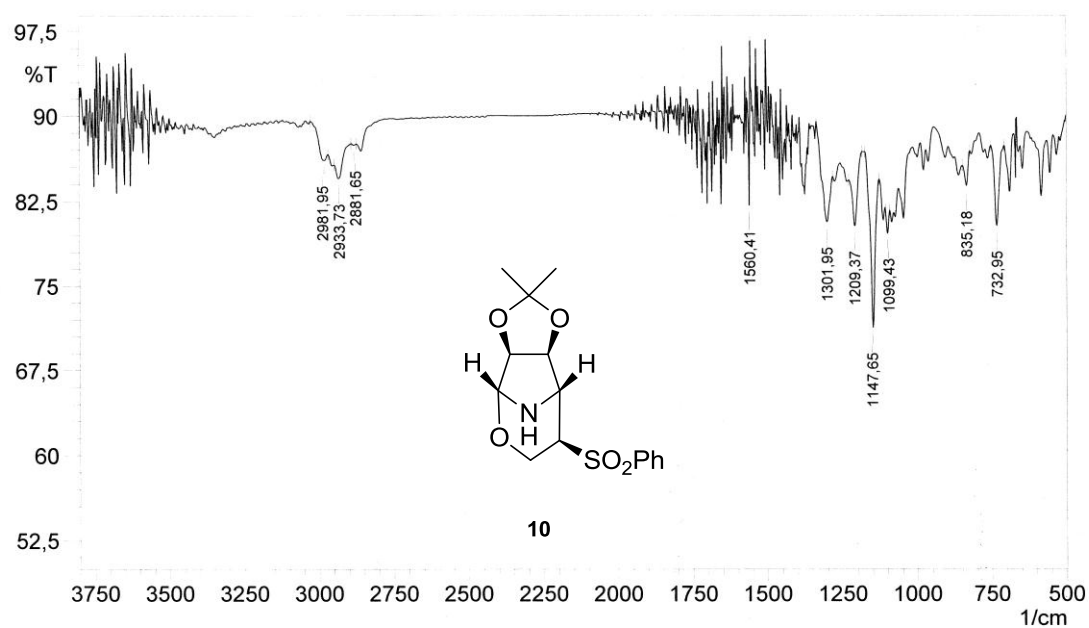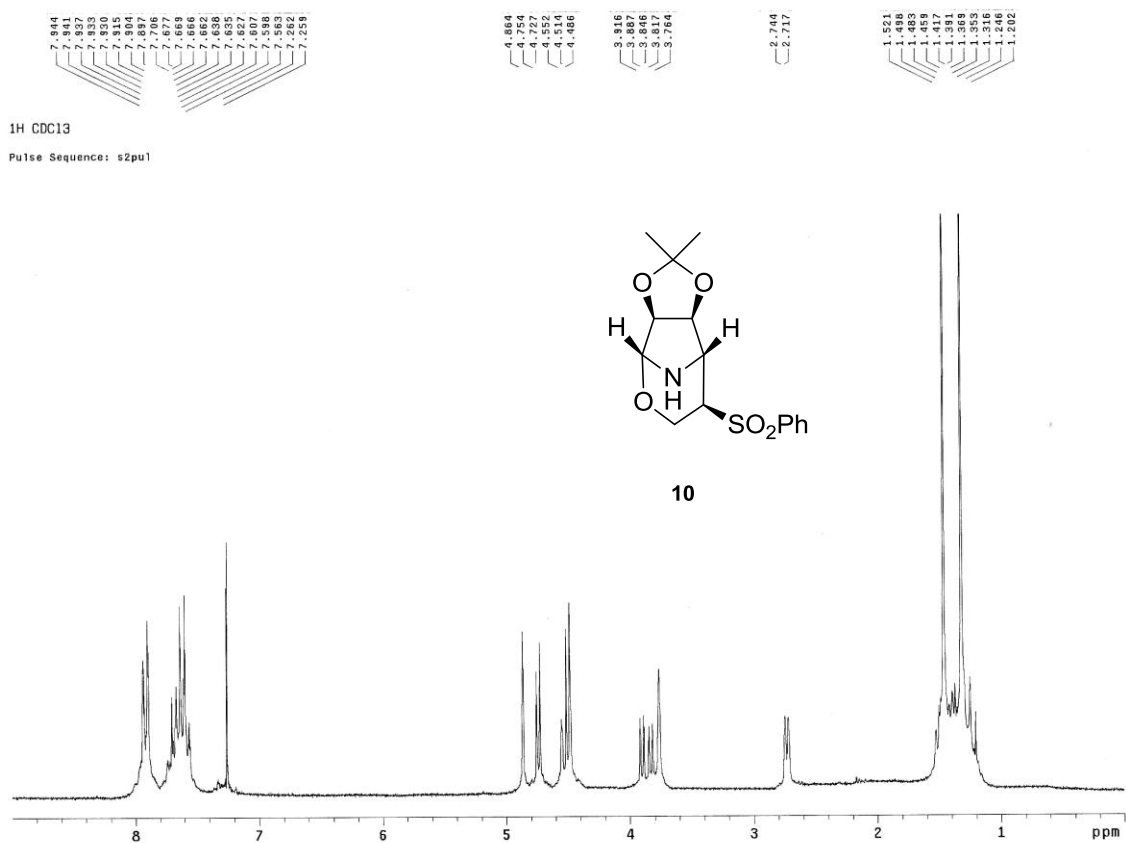

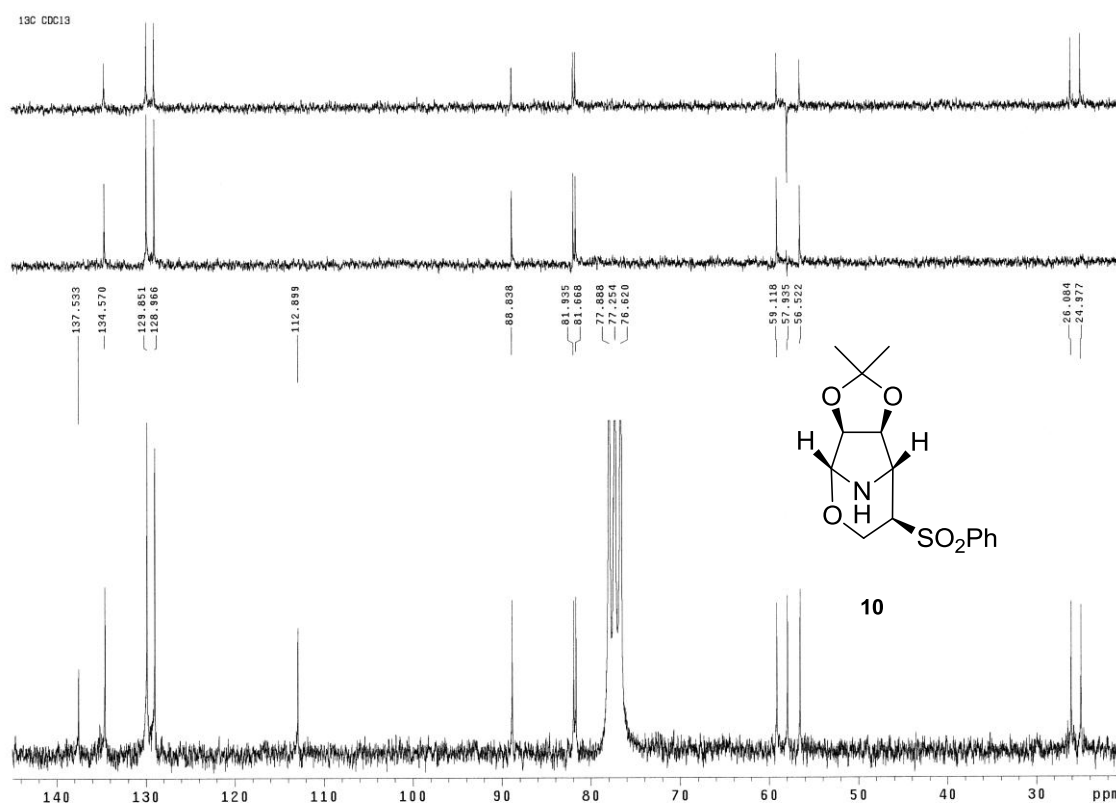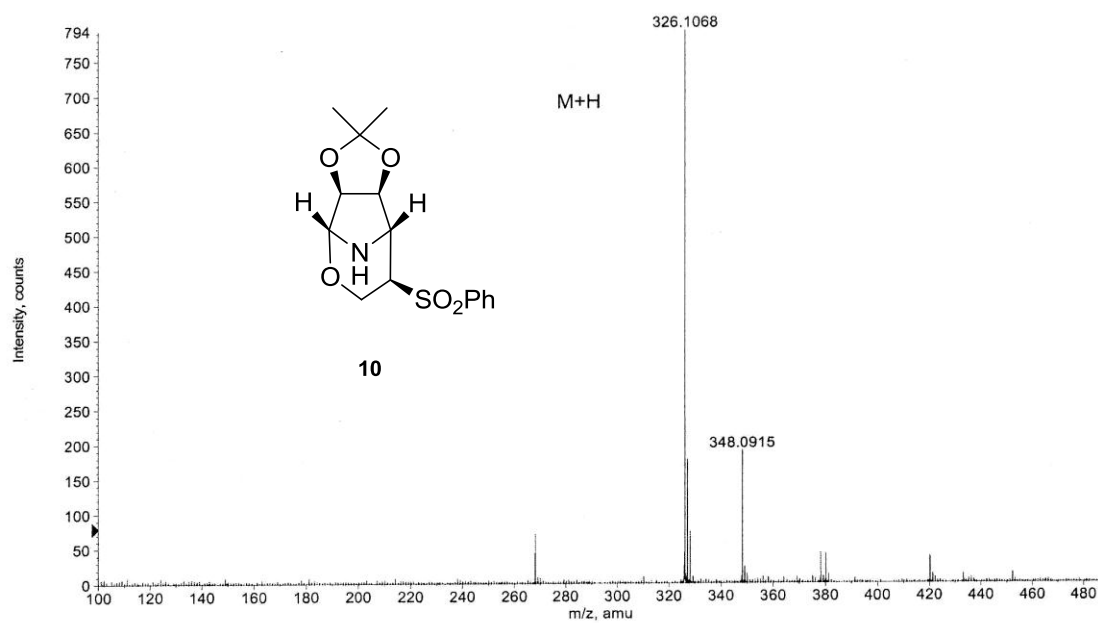

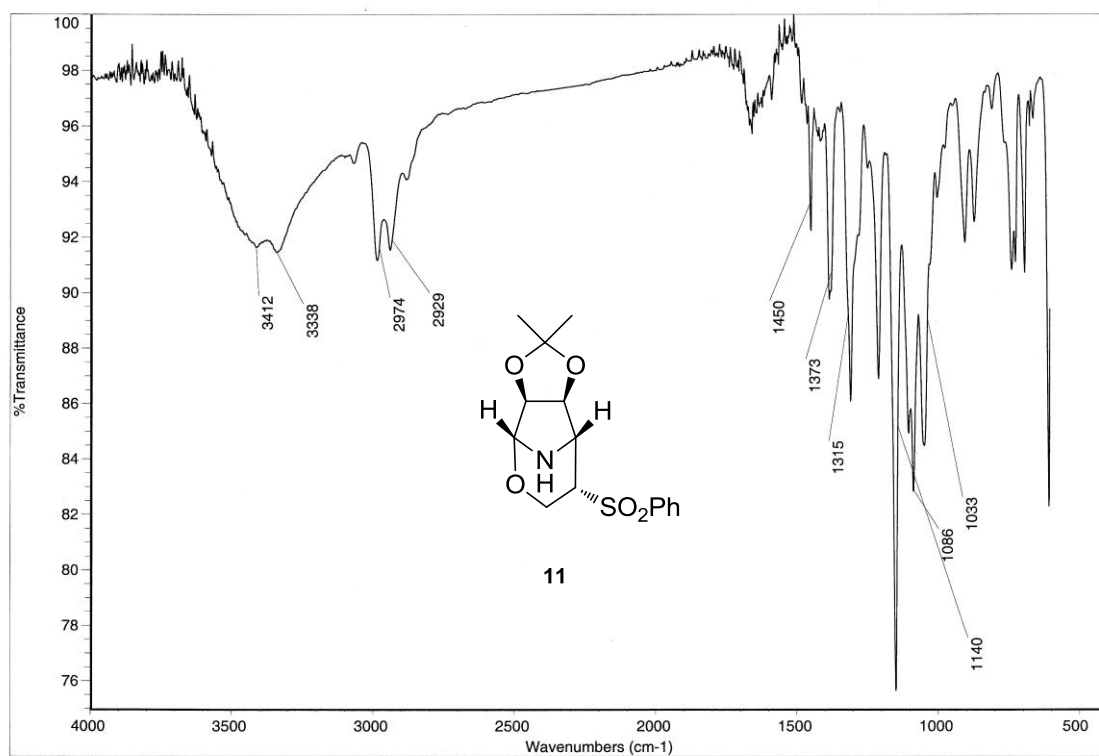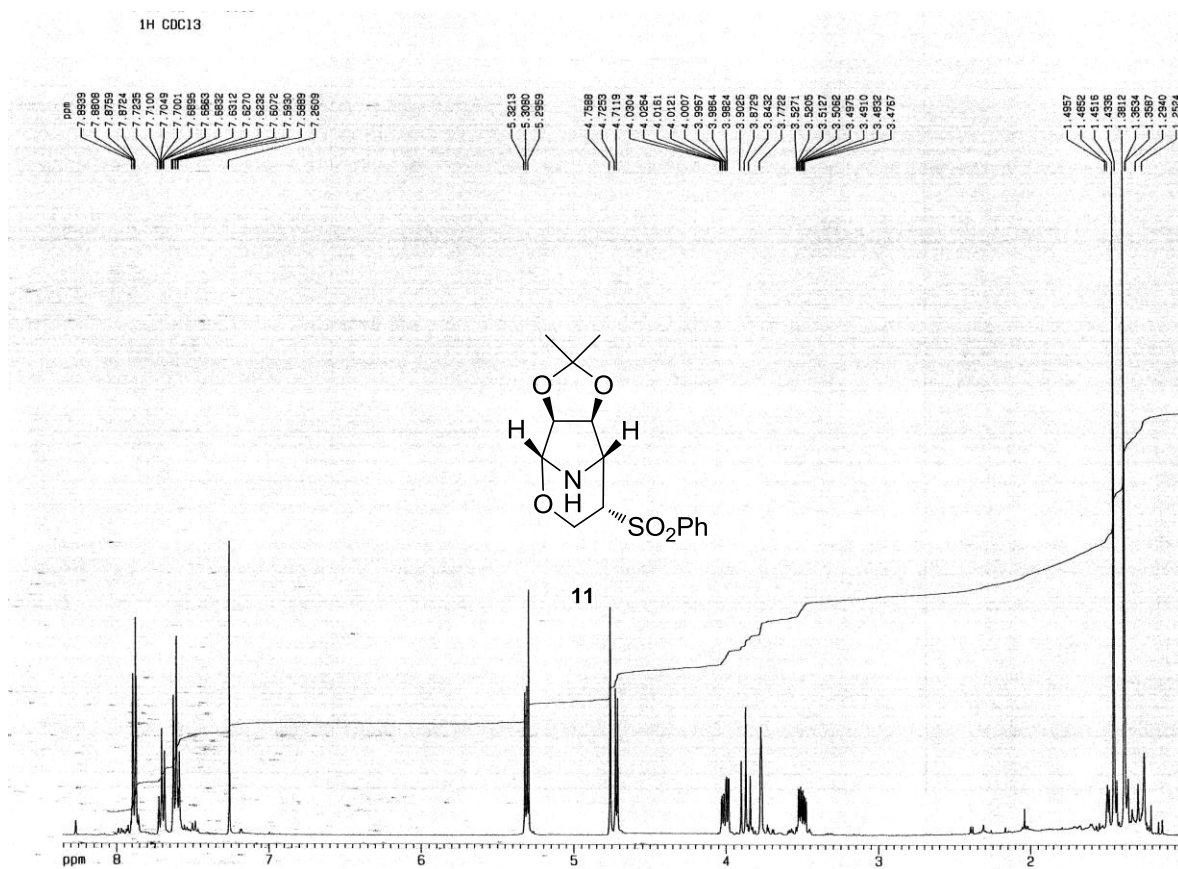

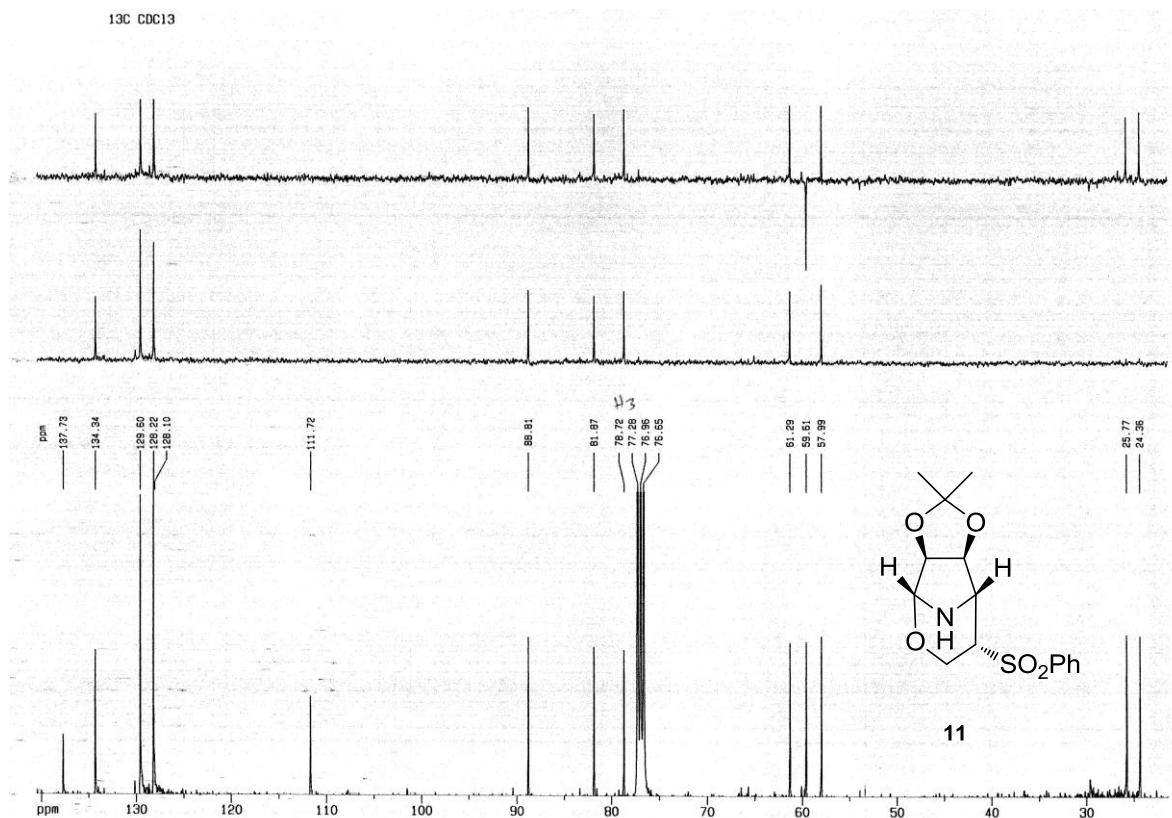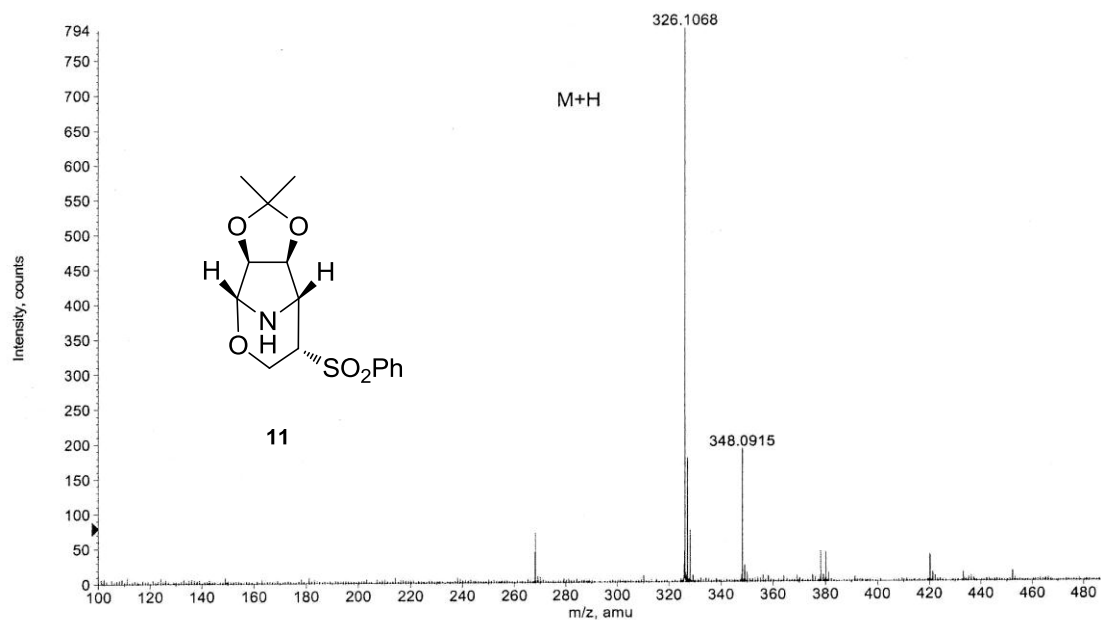

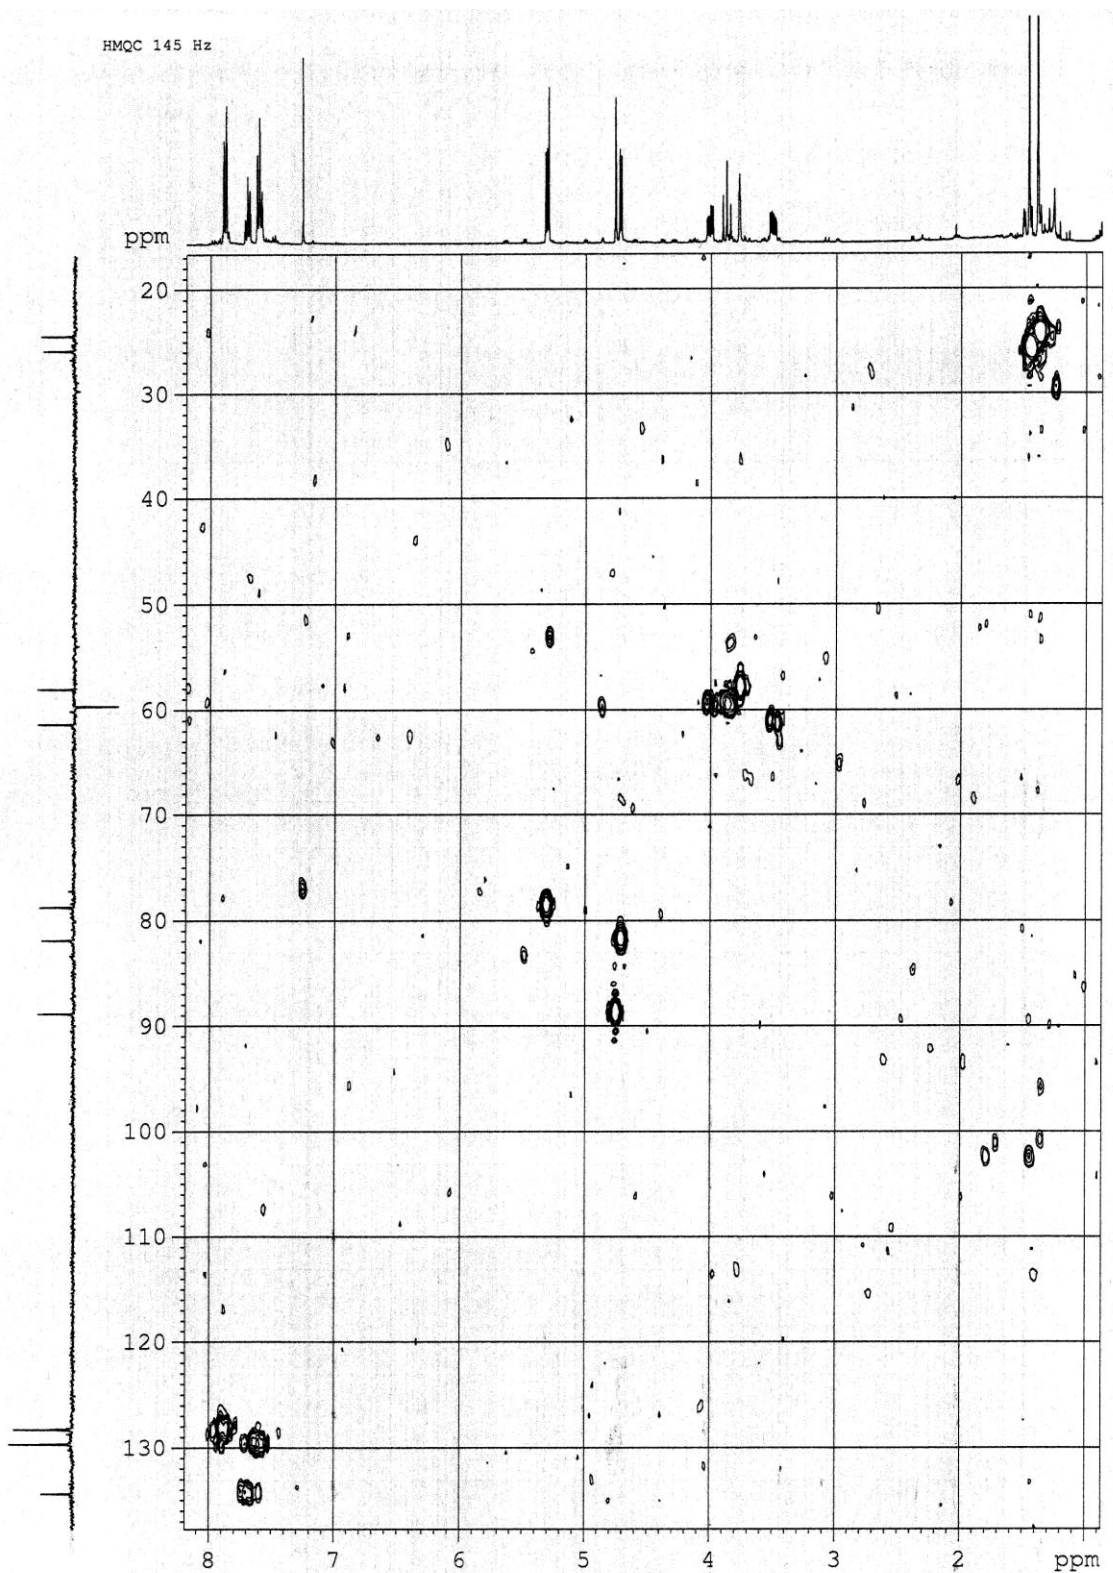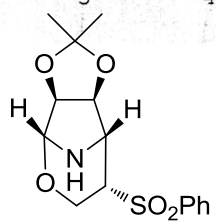

11

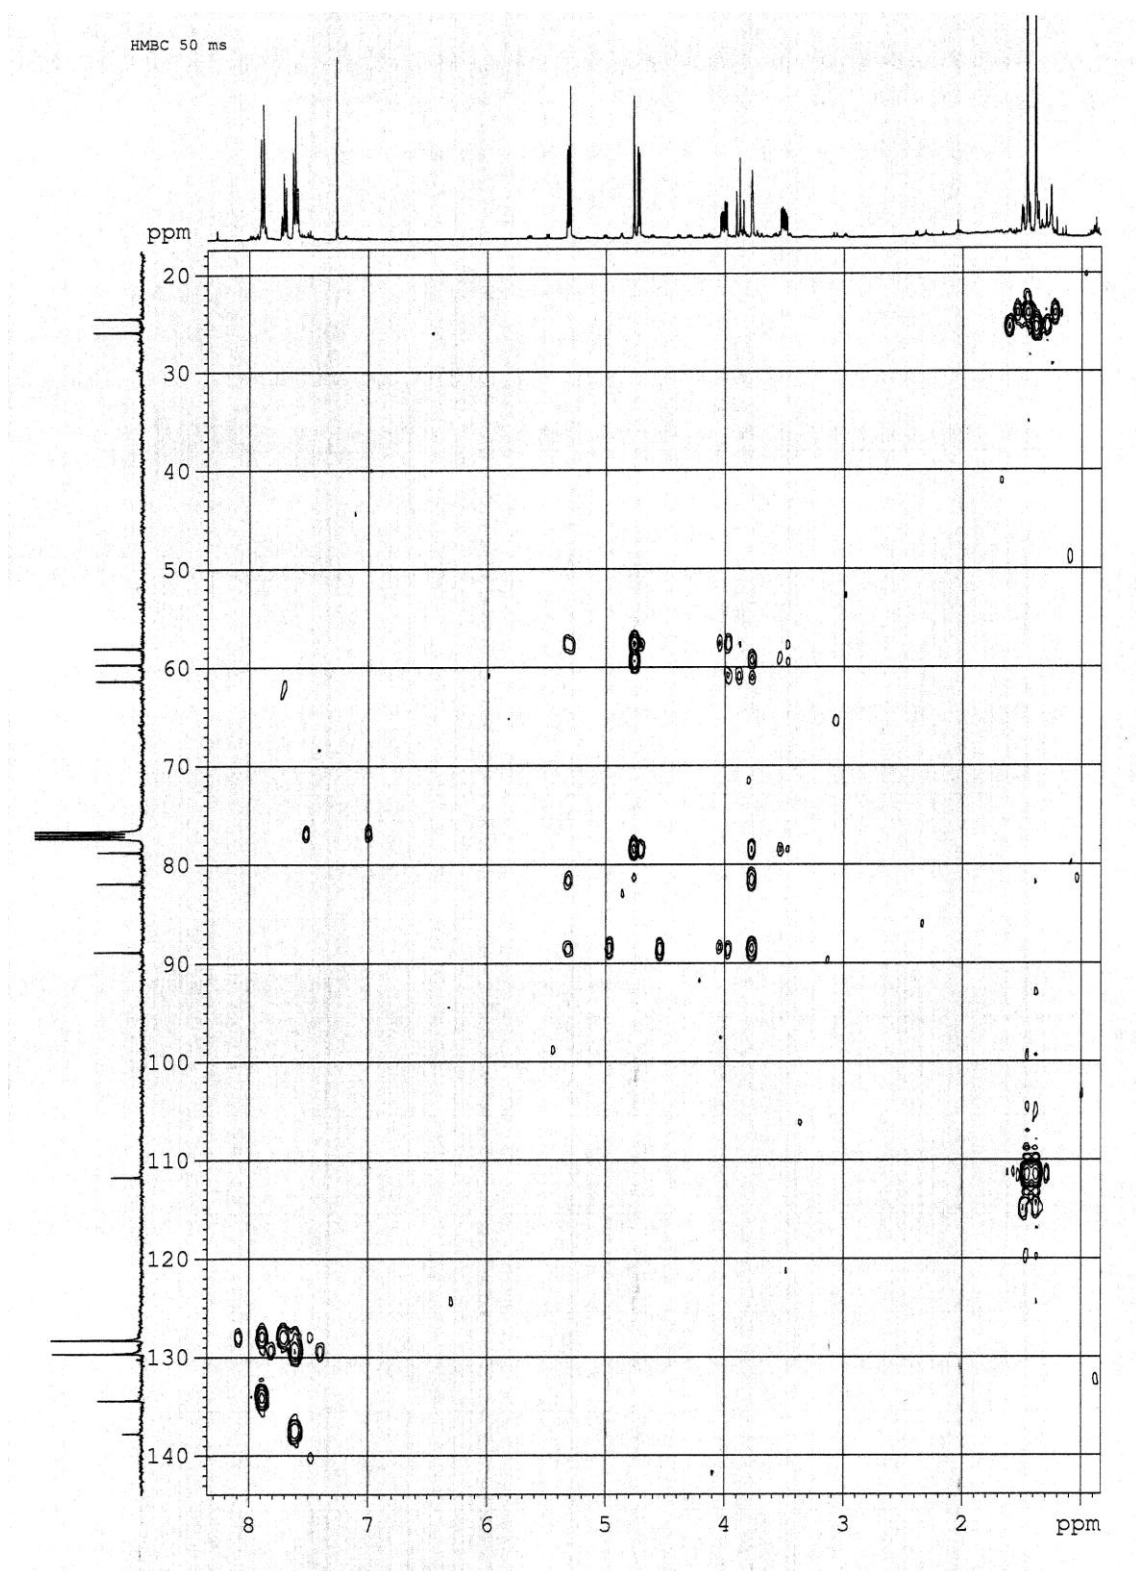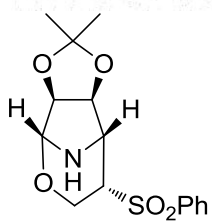

11

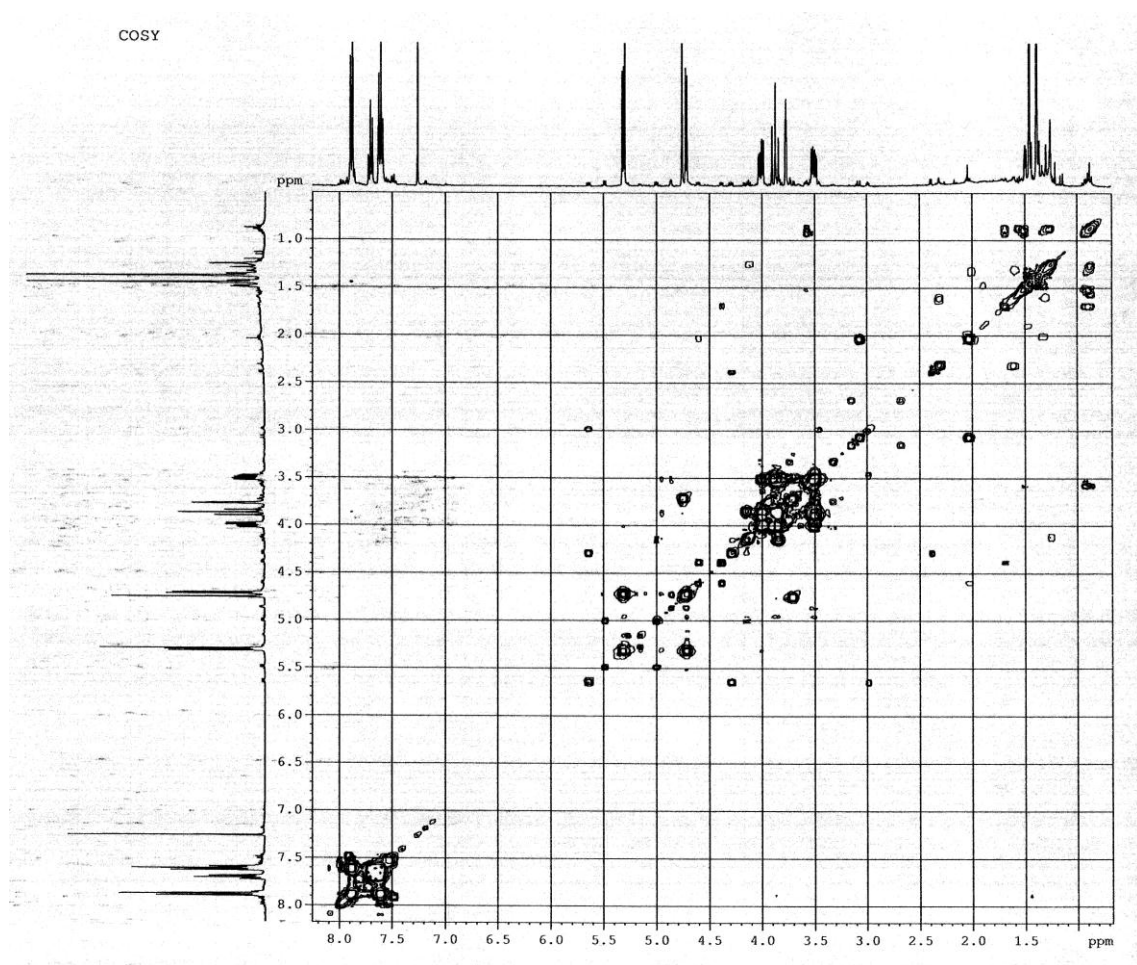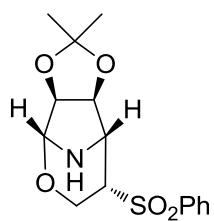

11

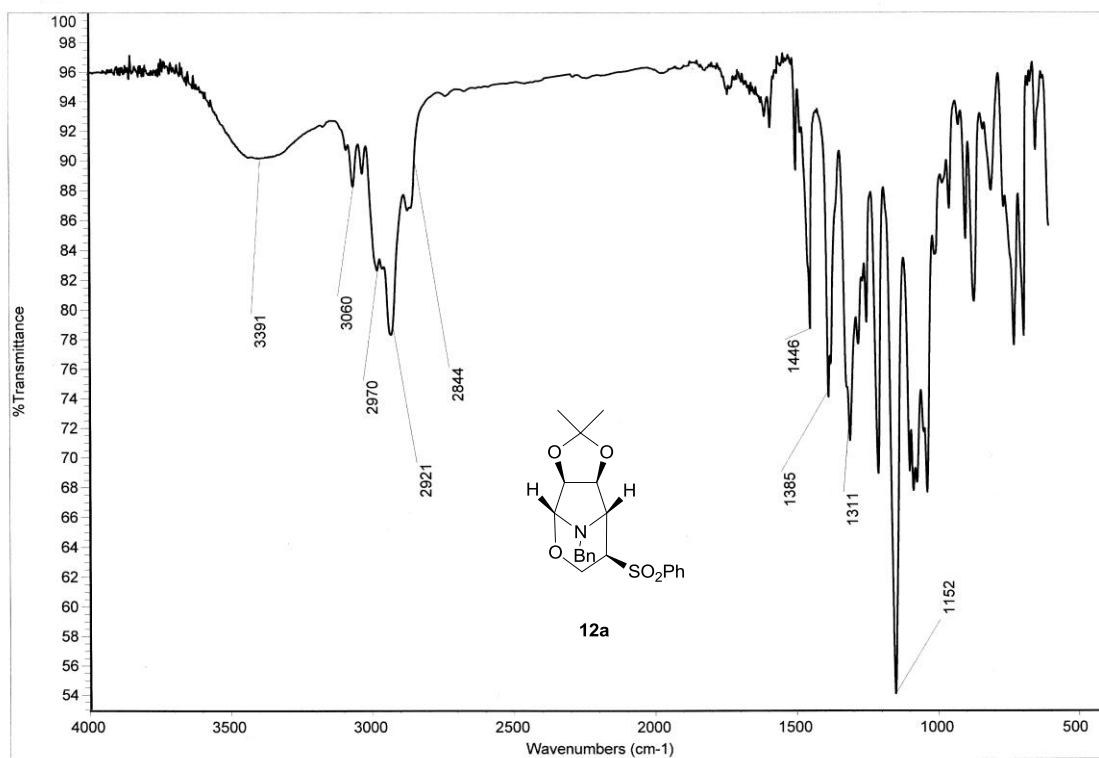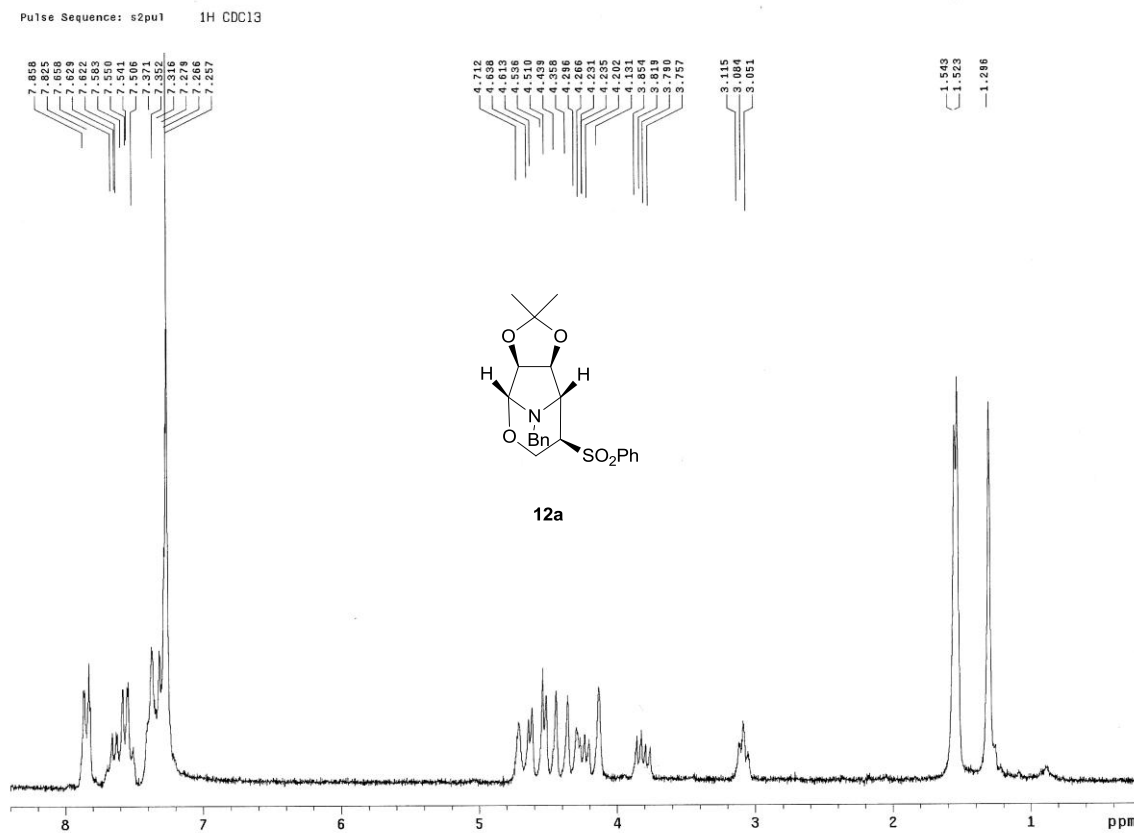

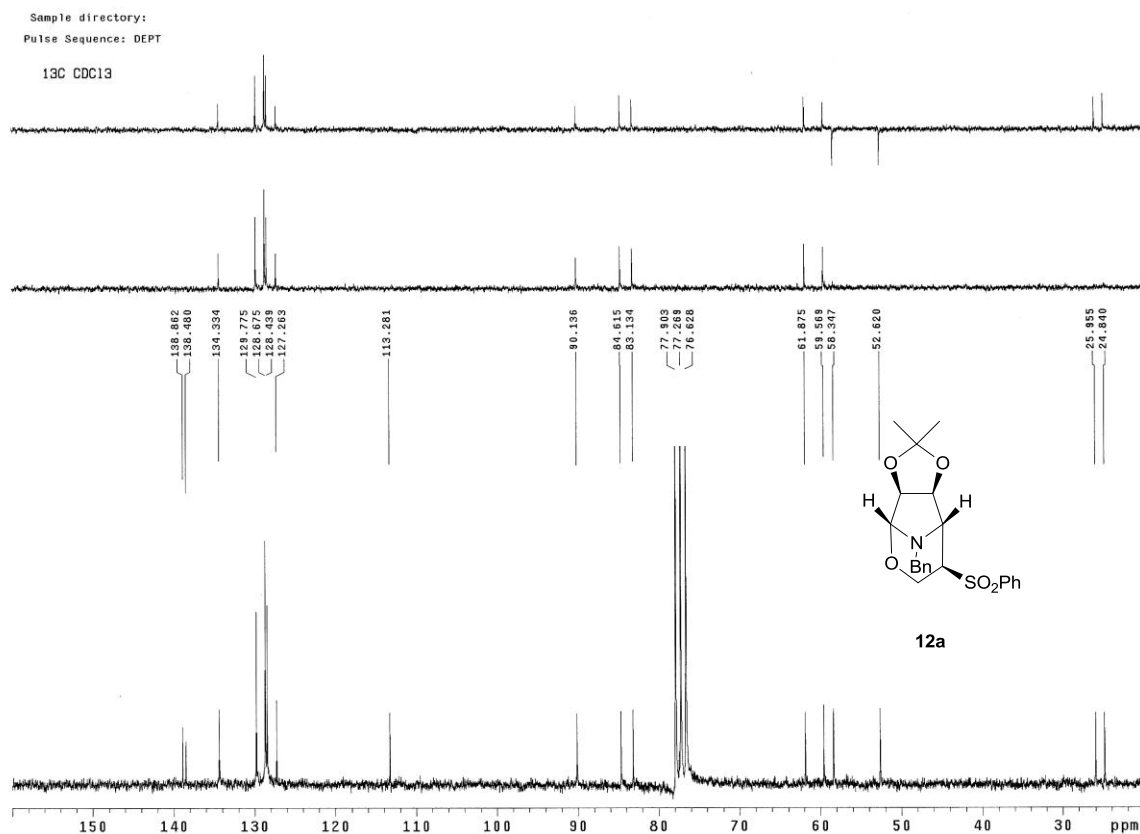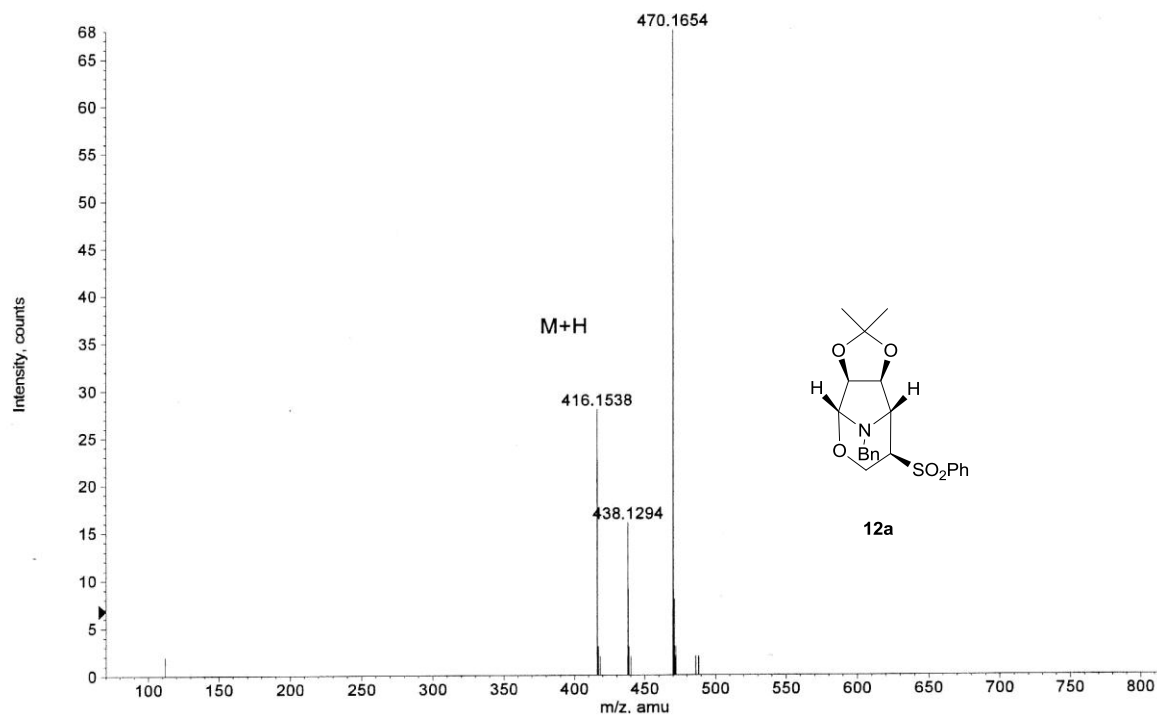

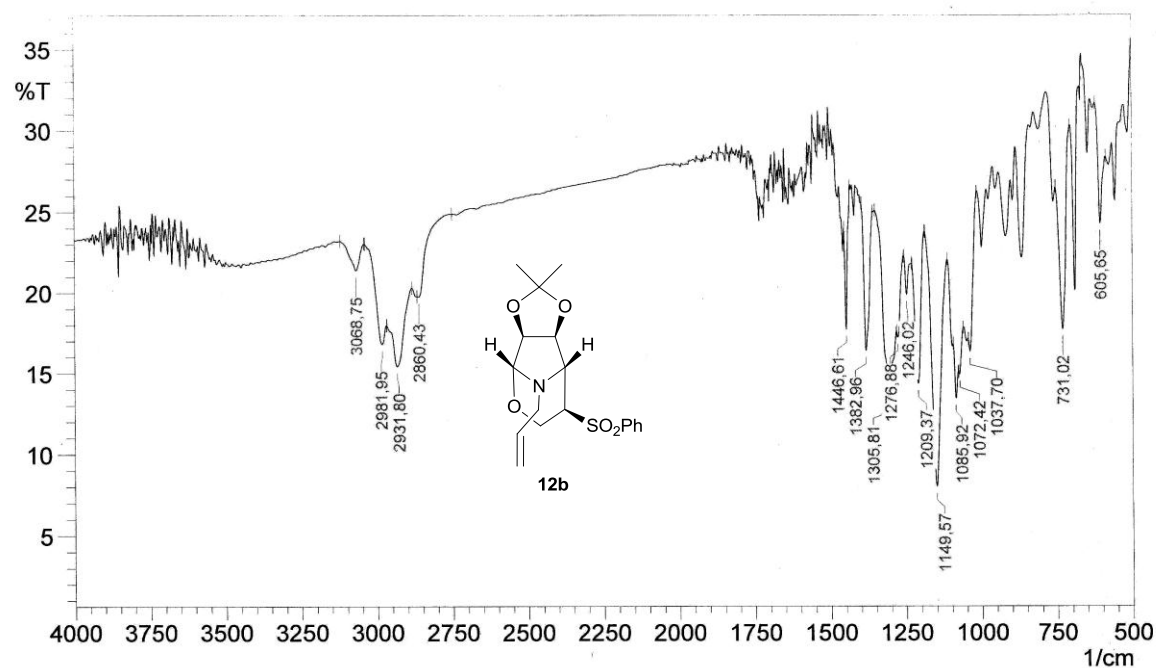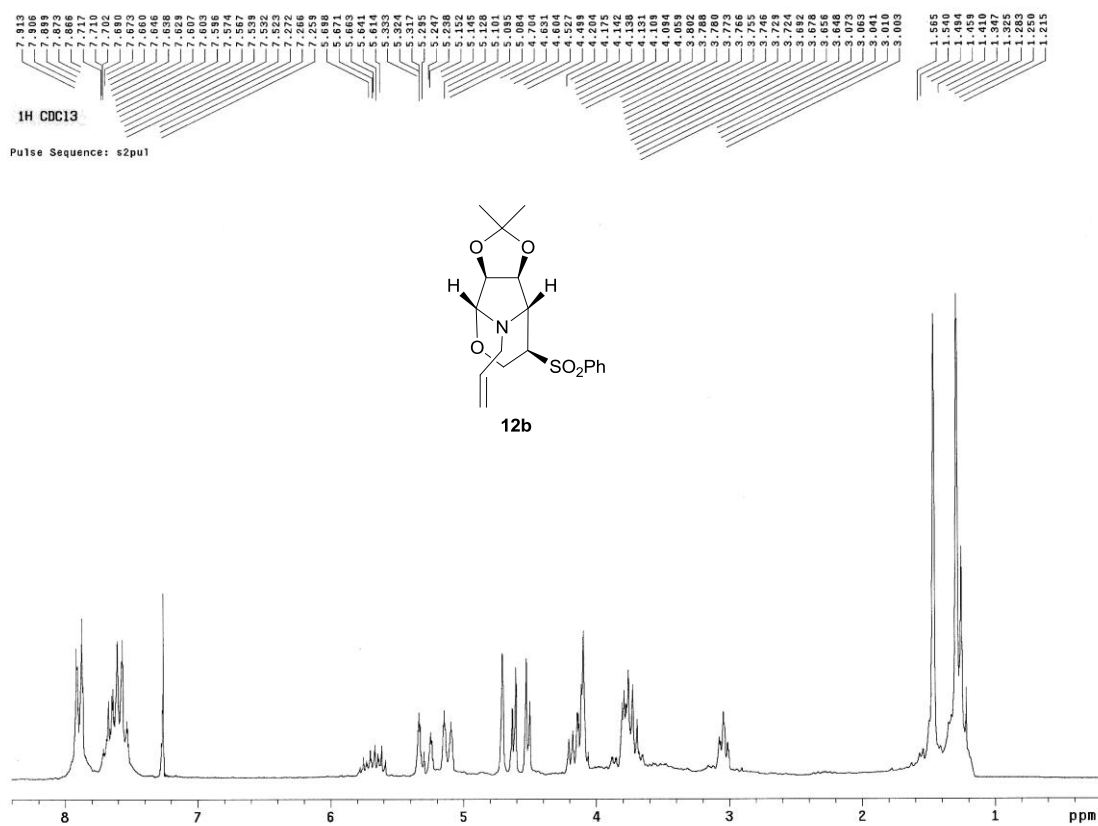

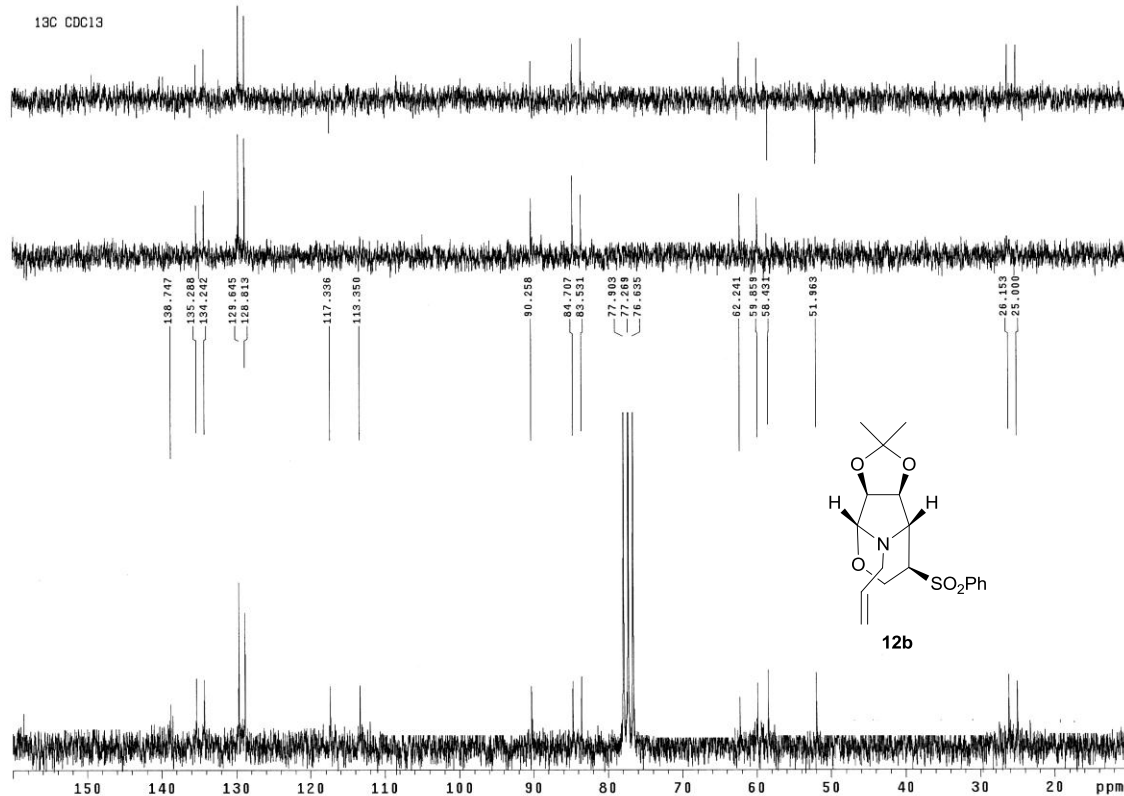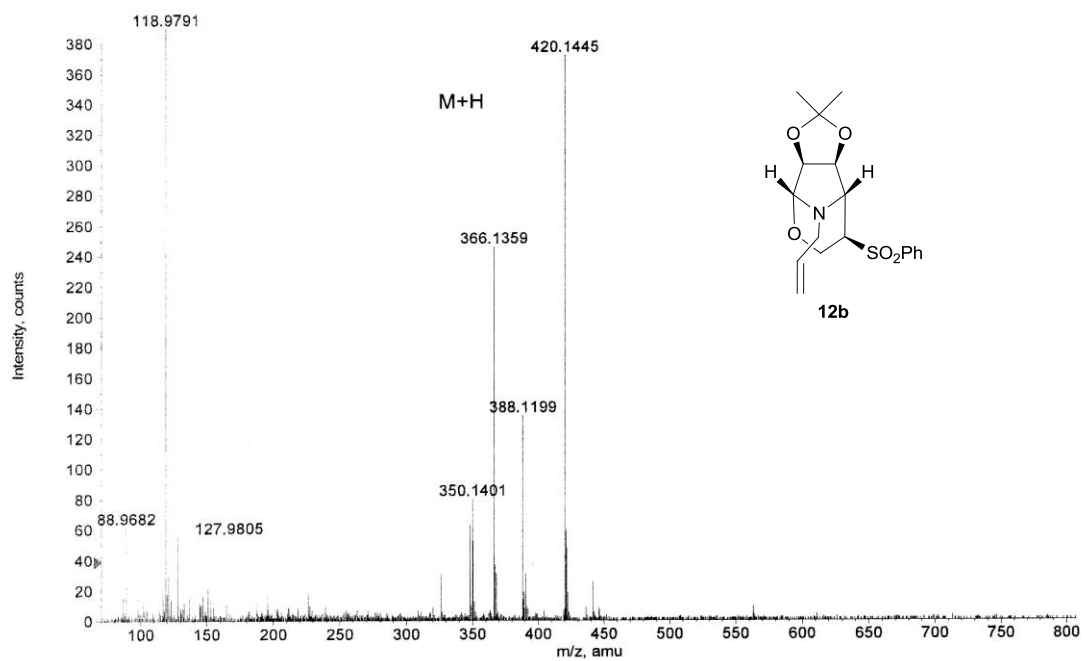

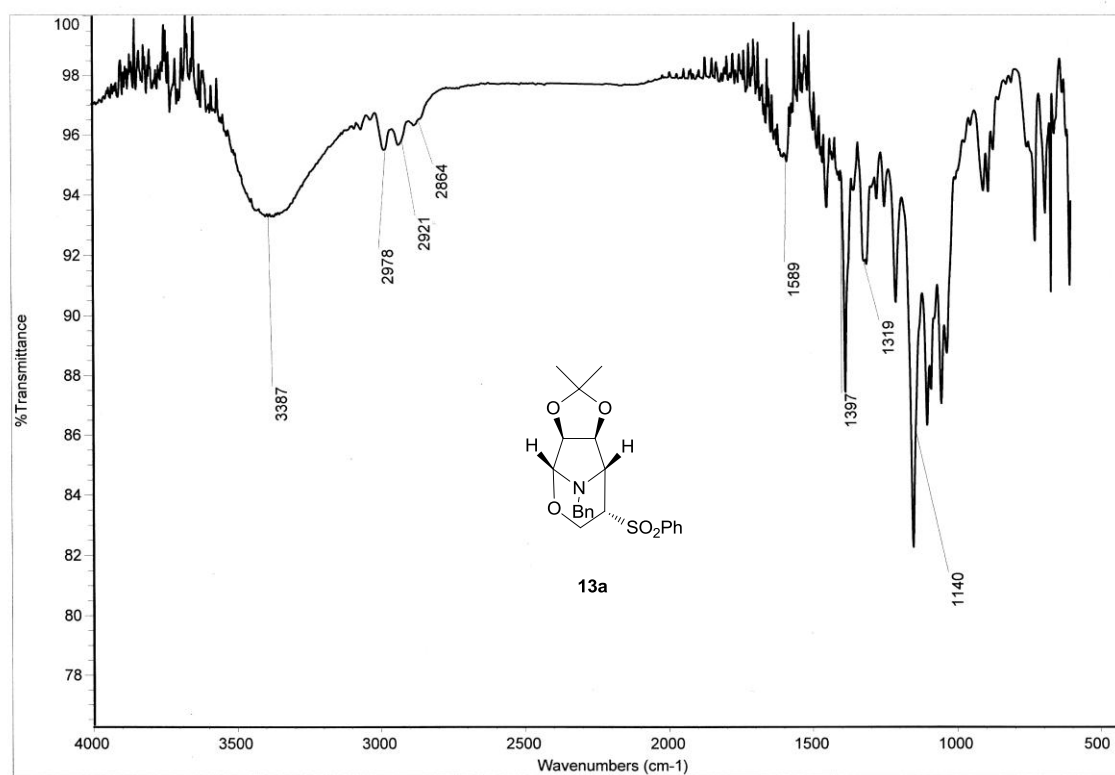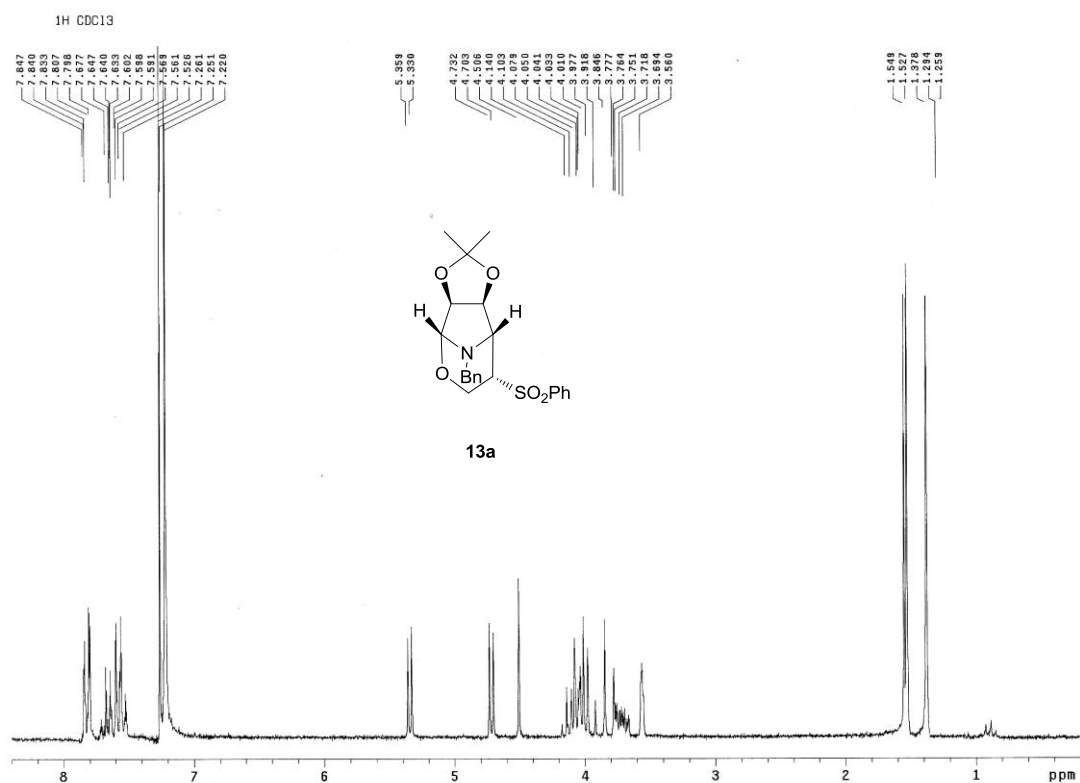

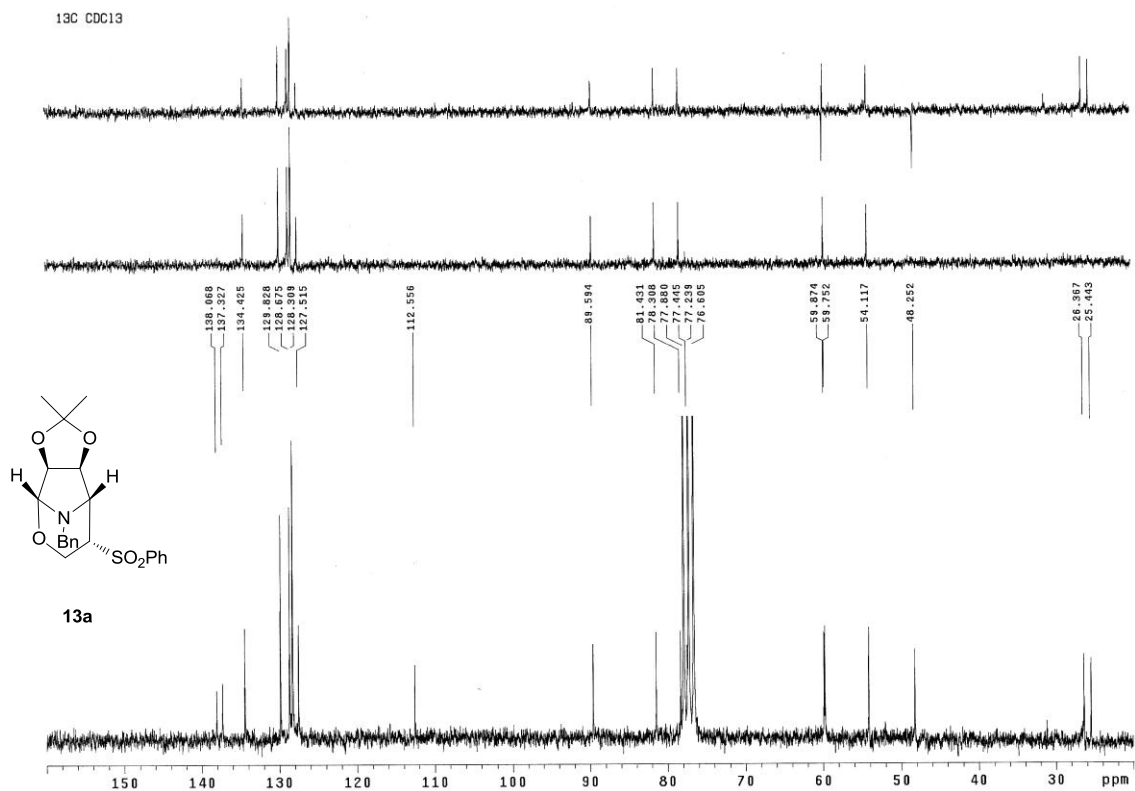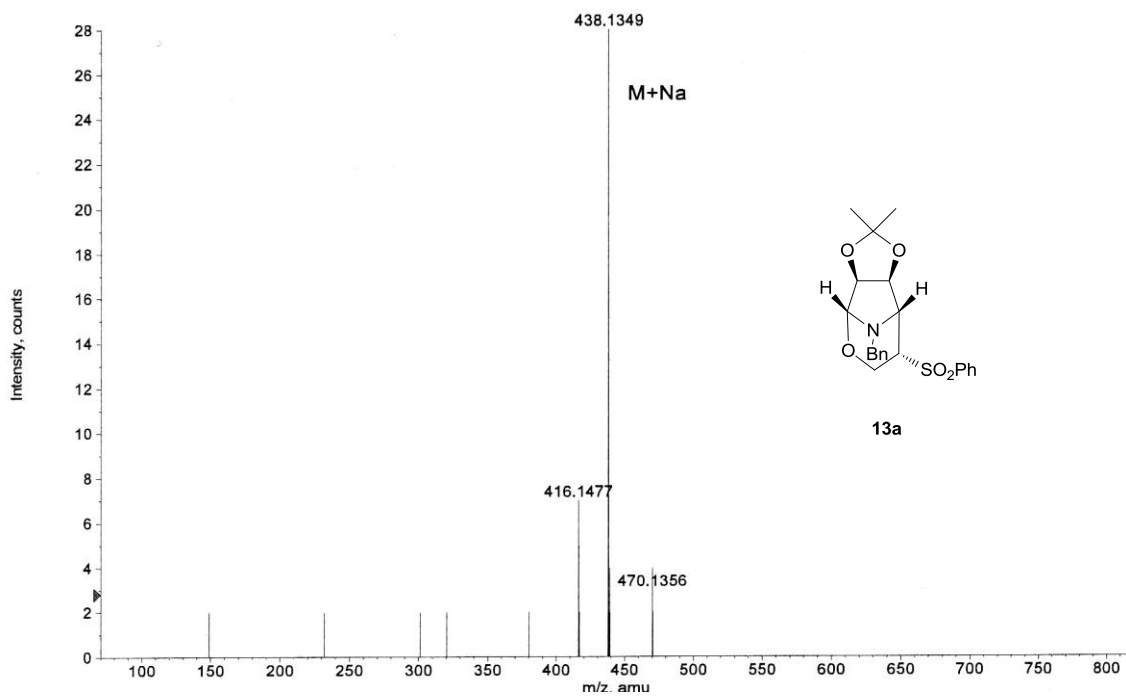

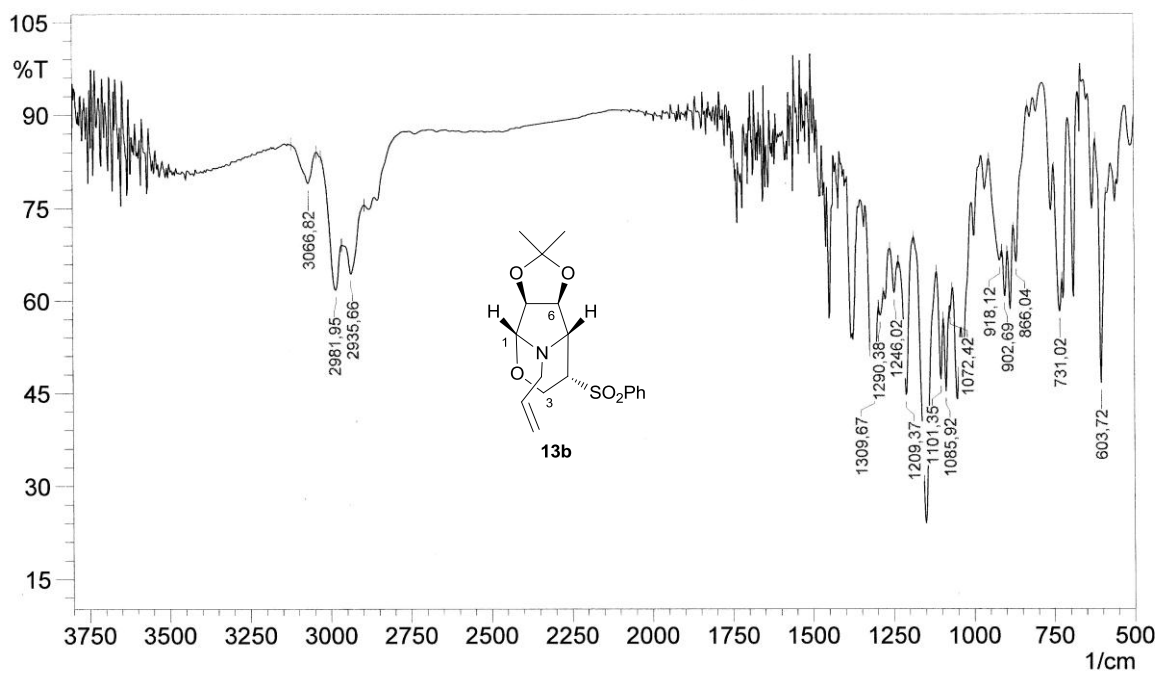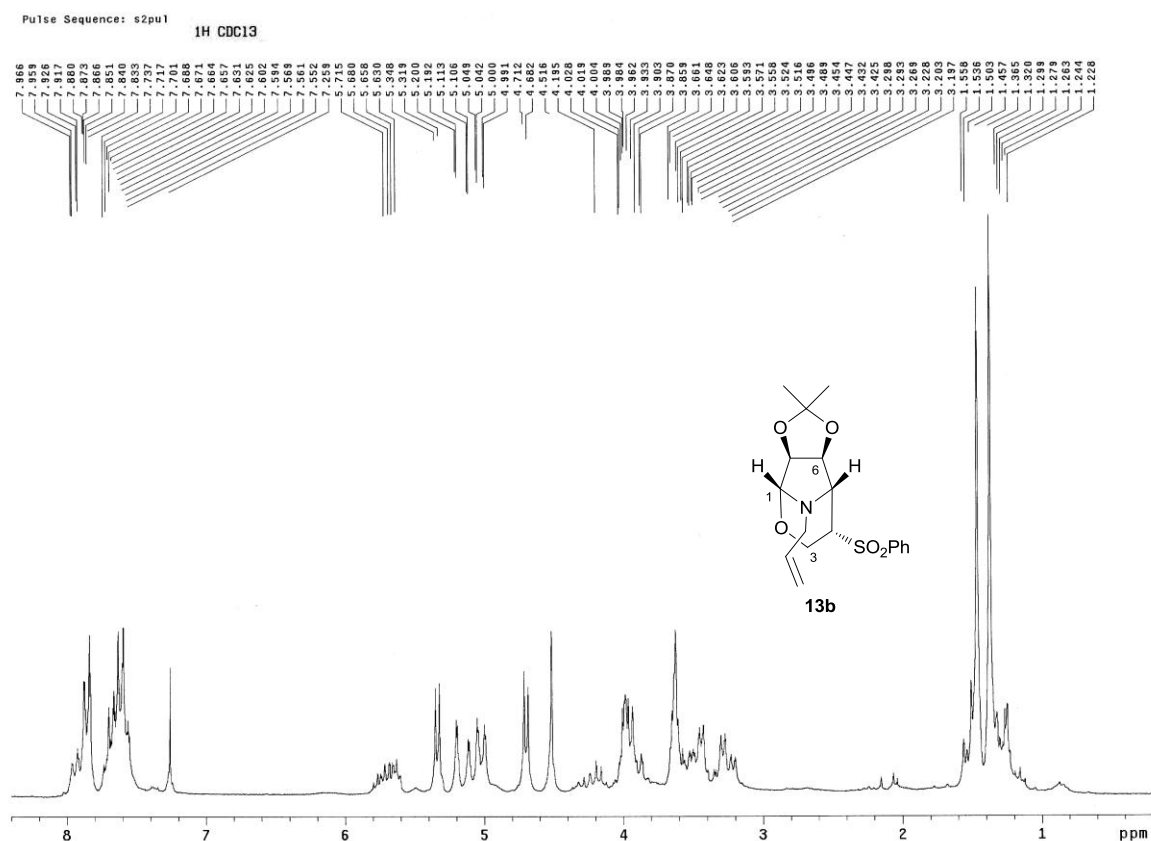

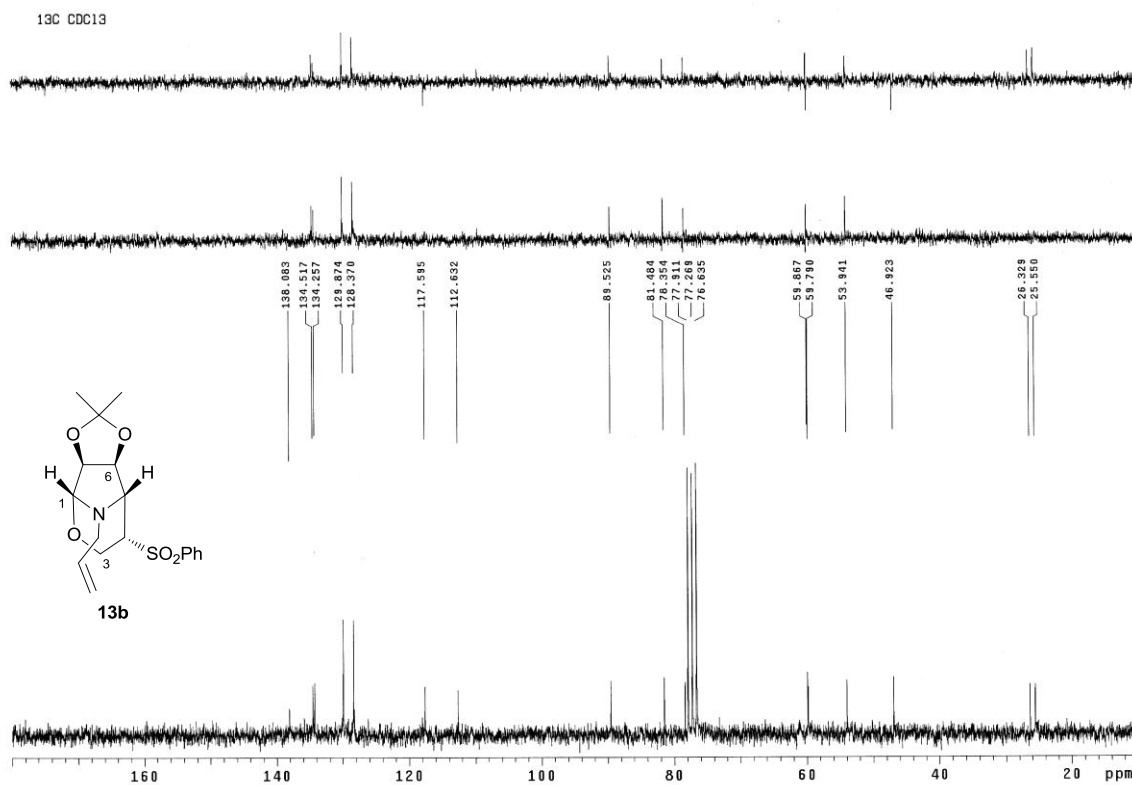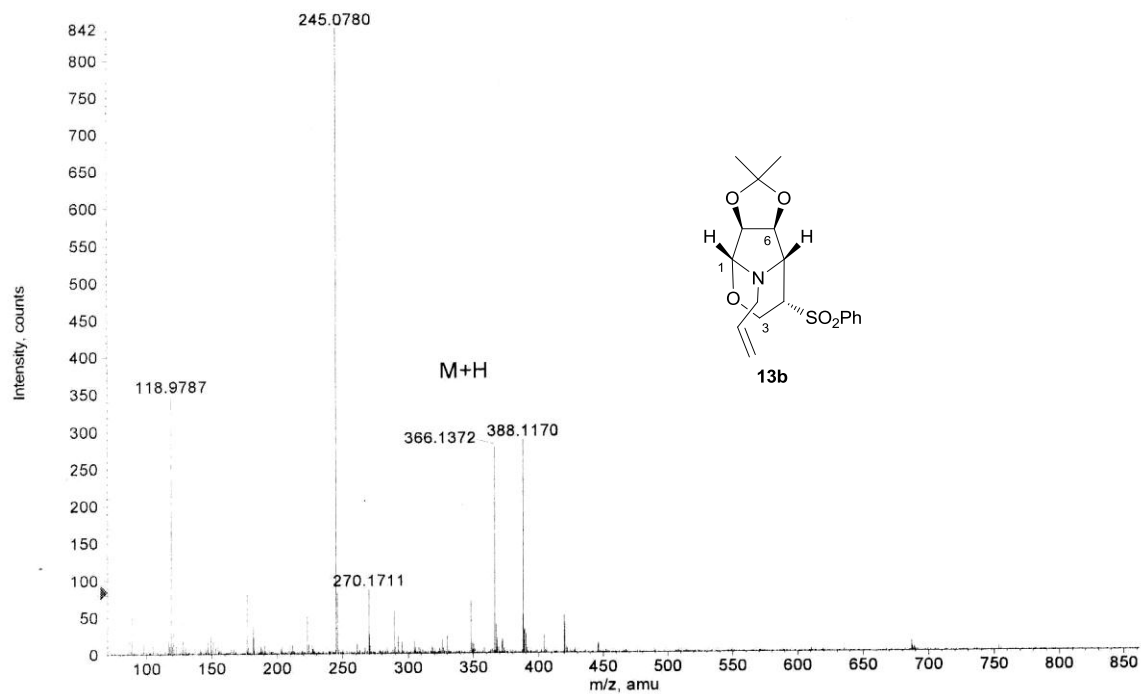

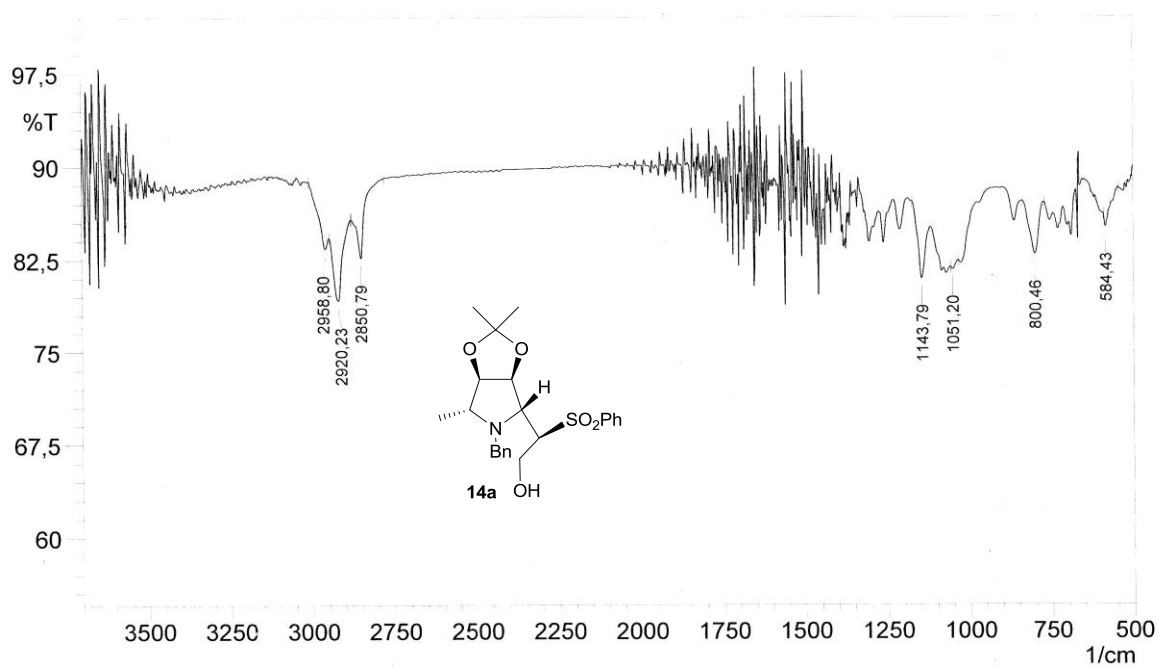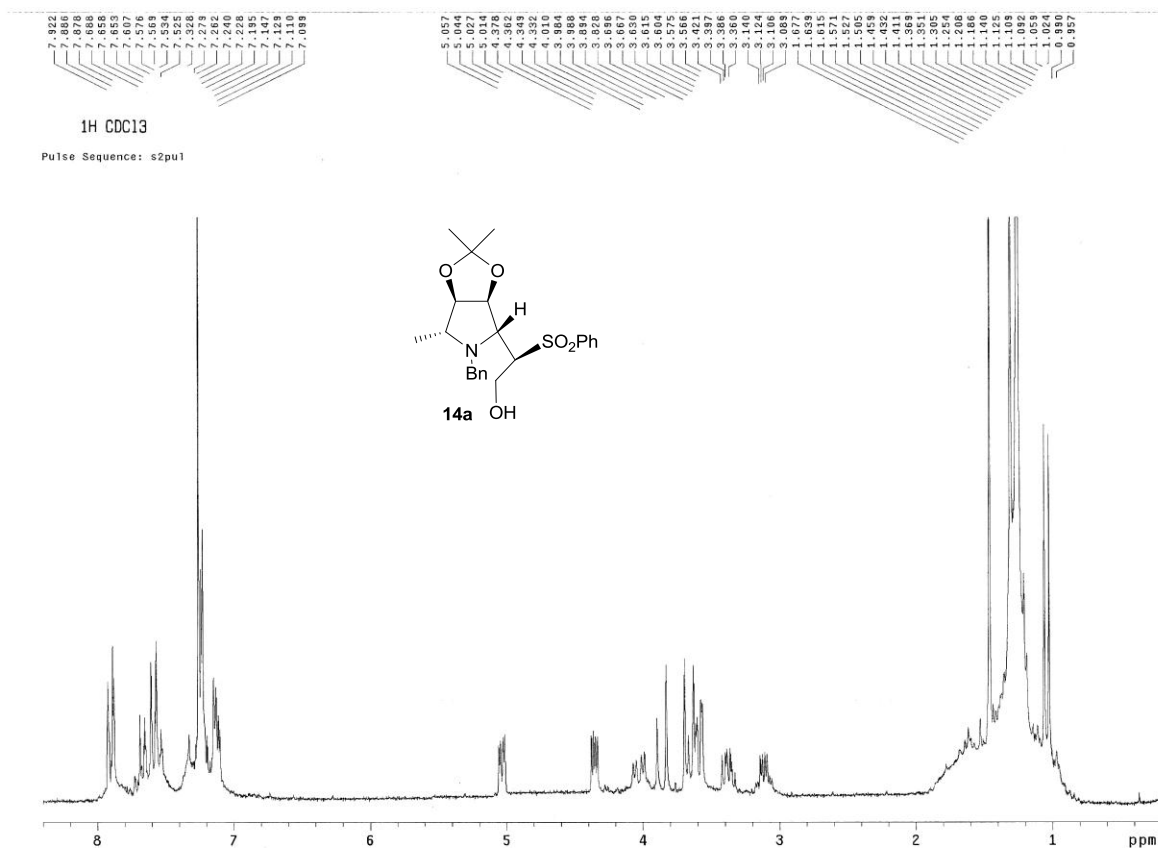

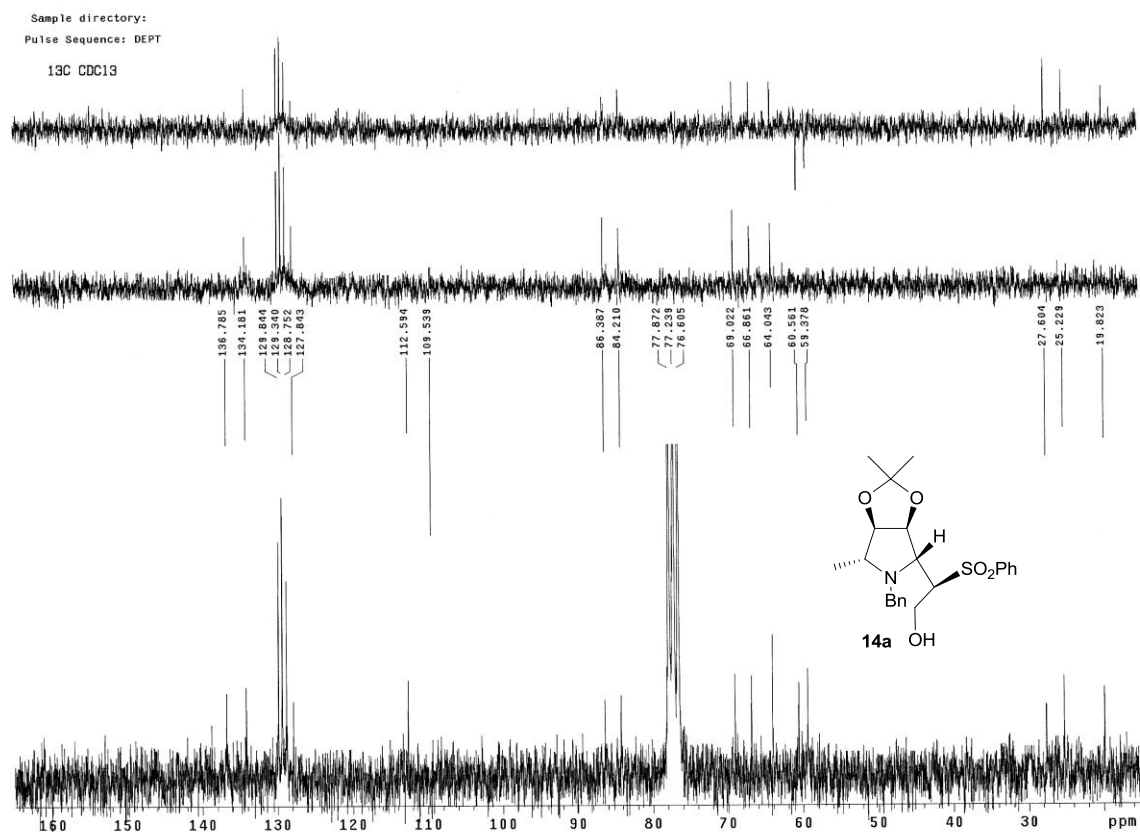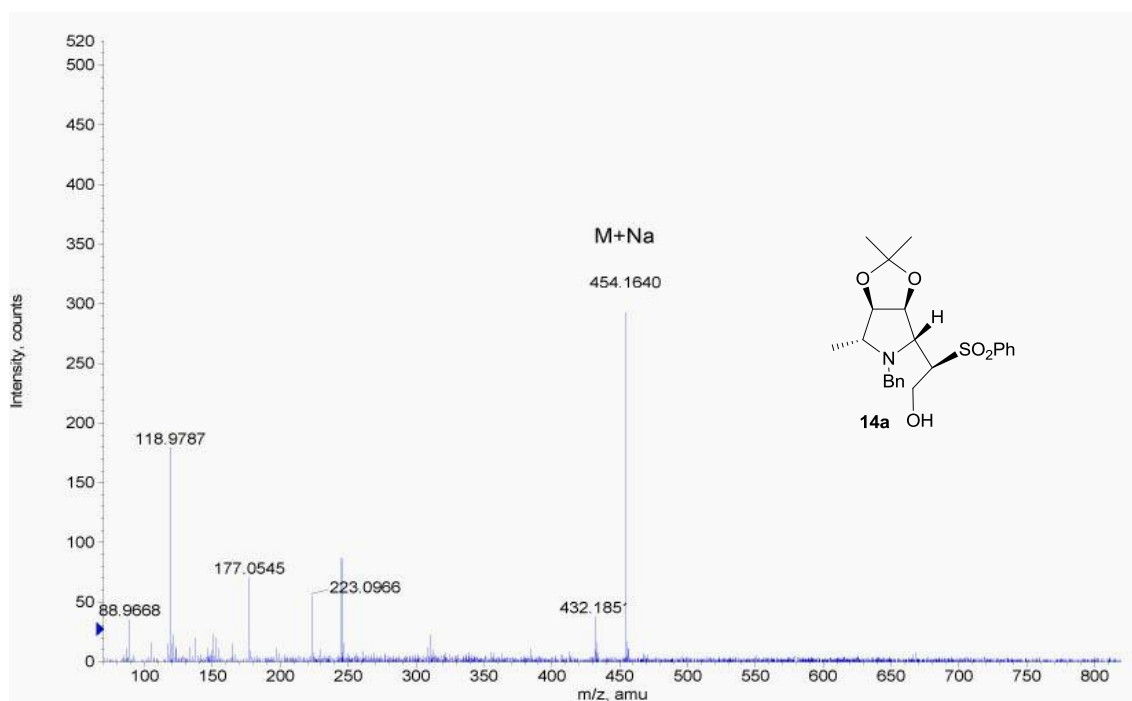

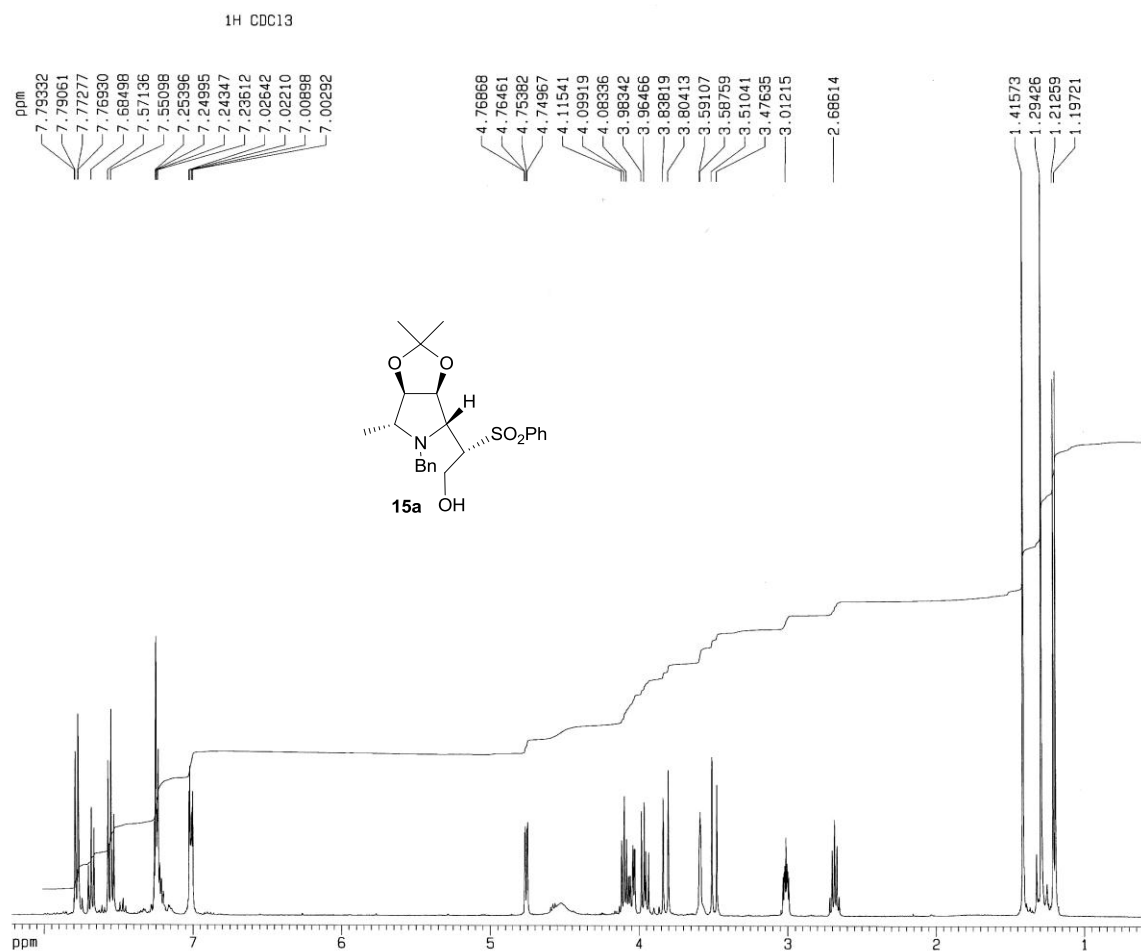

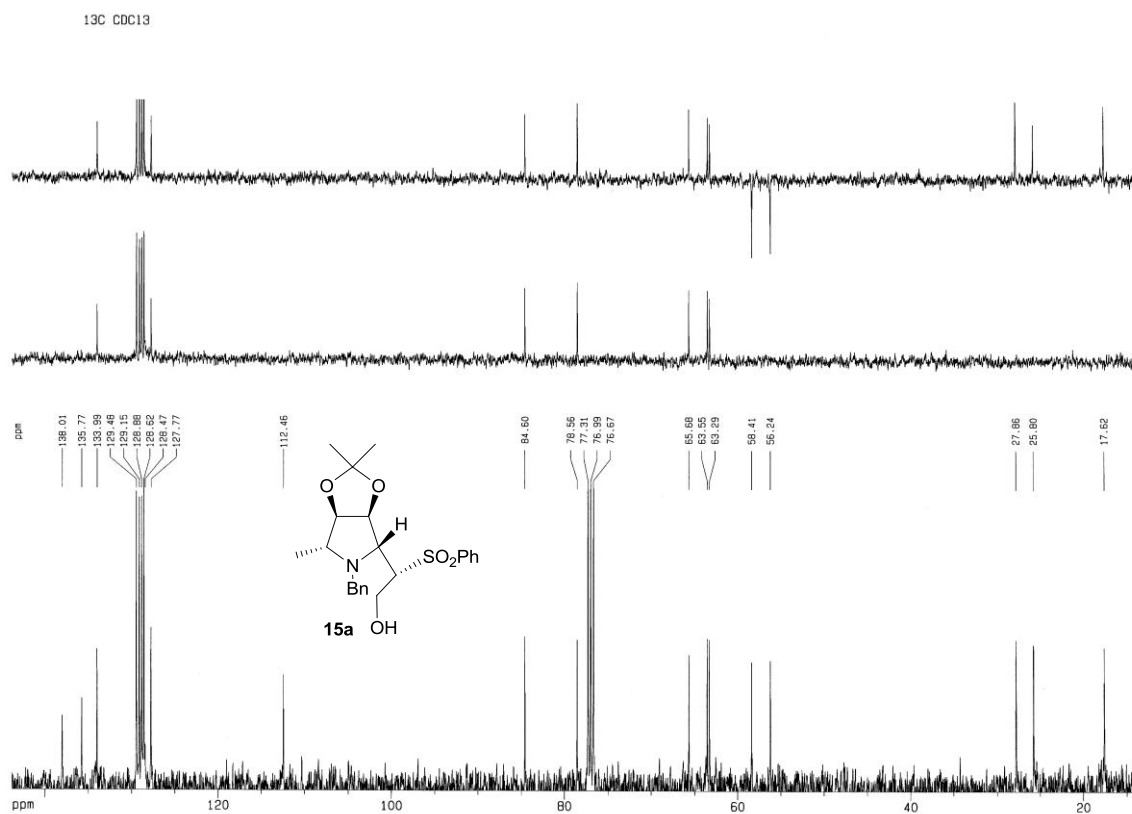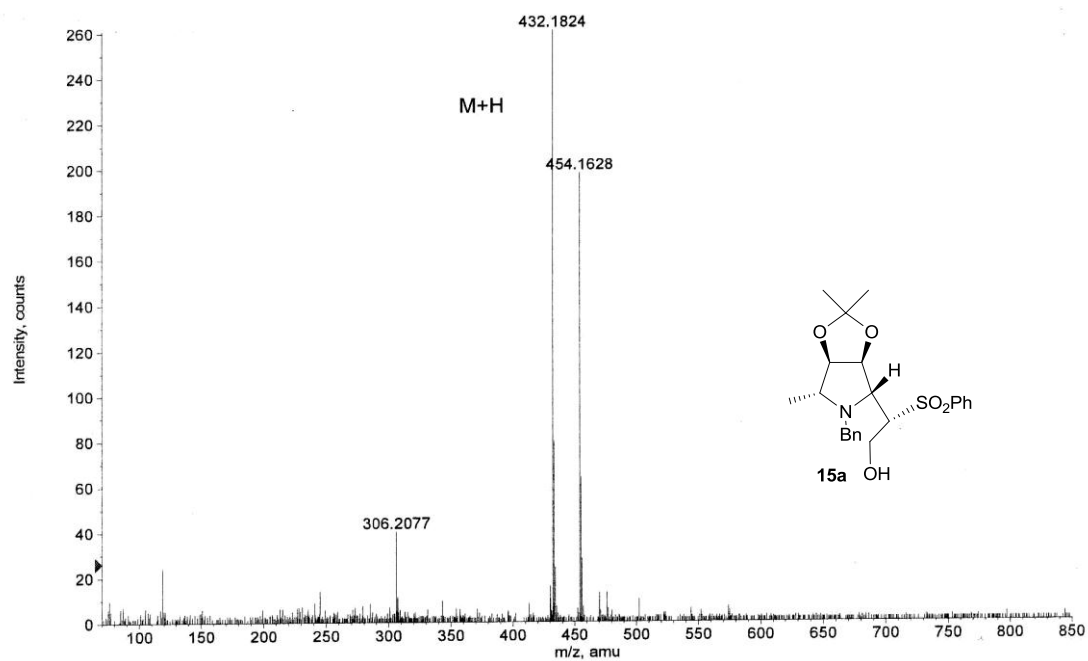

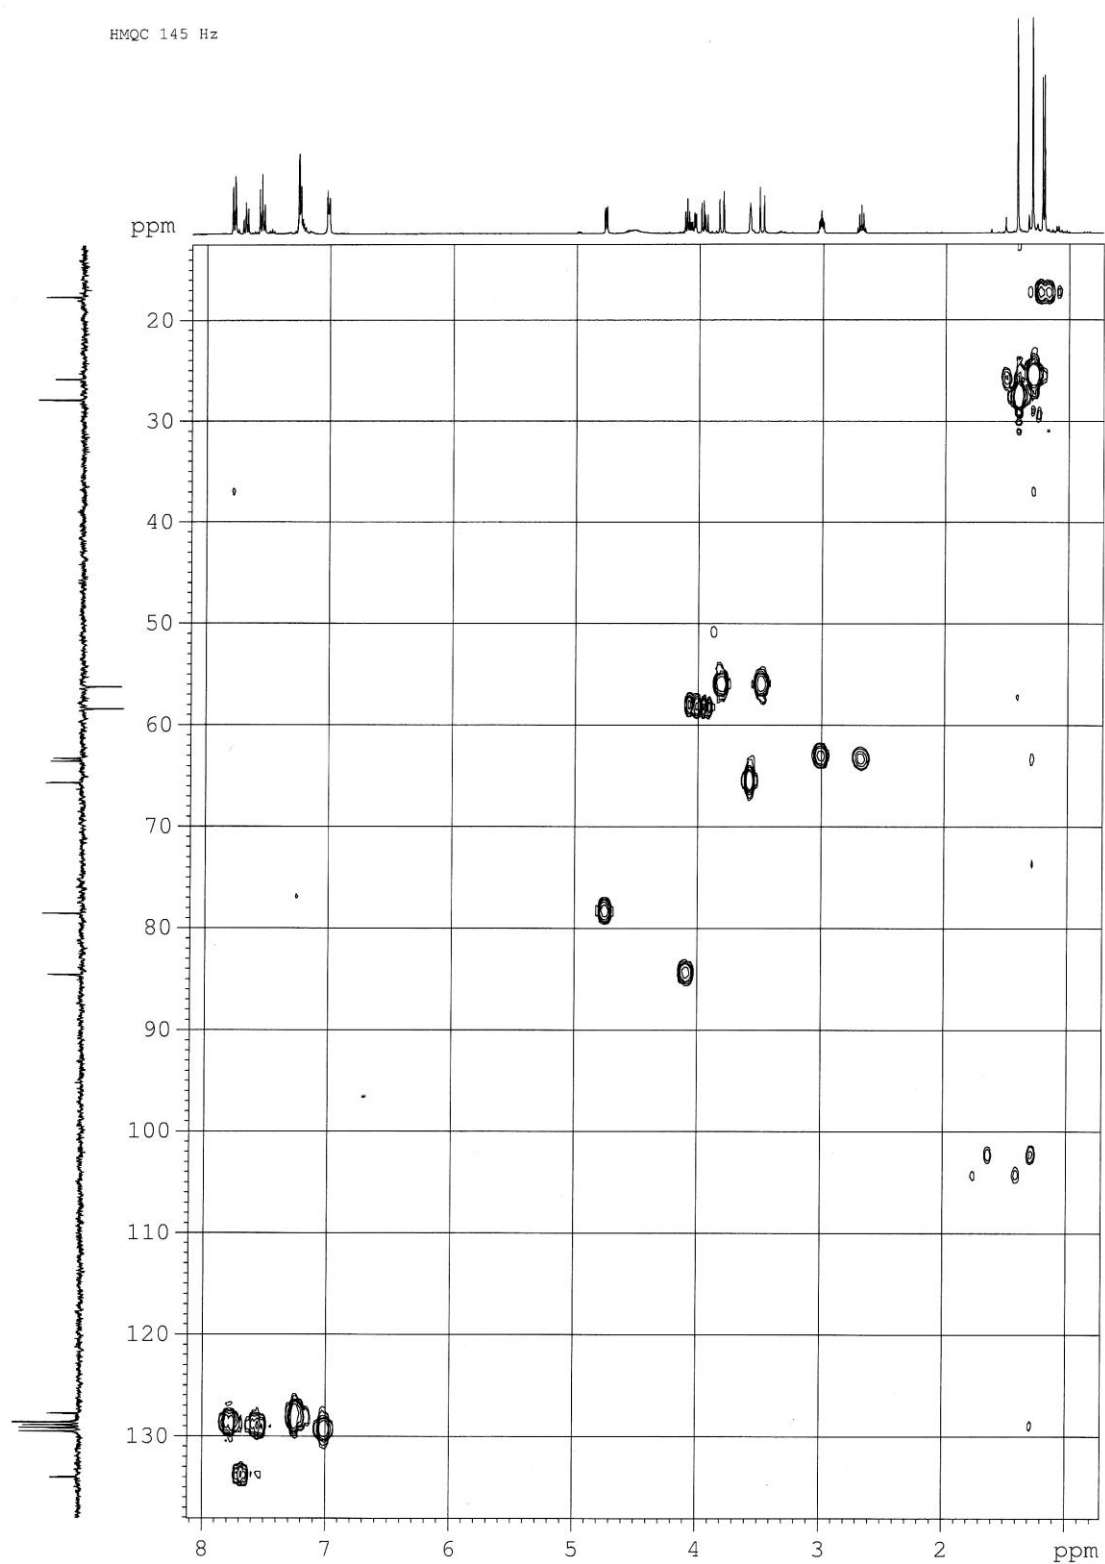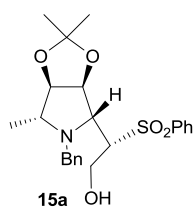

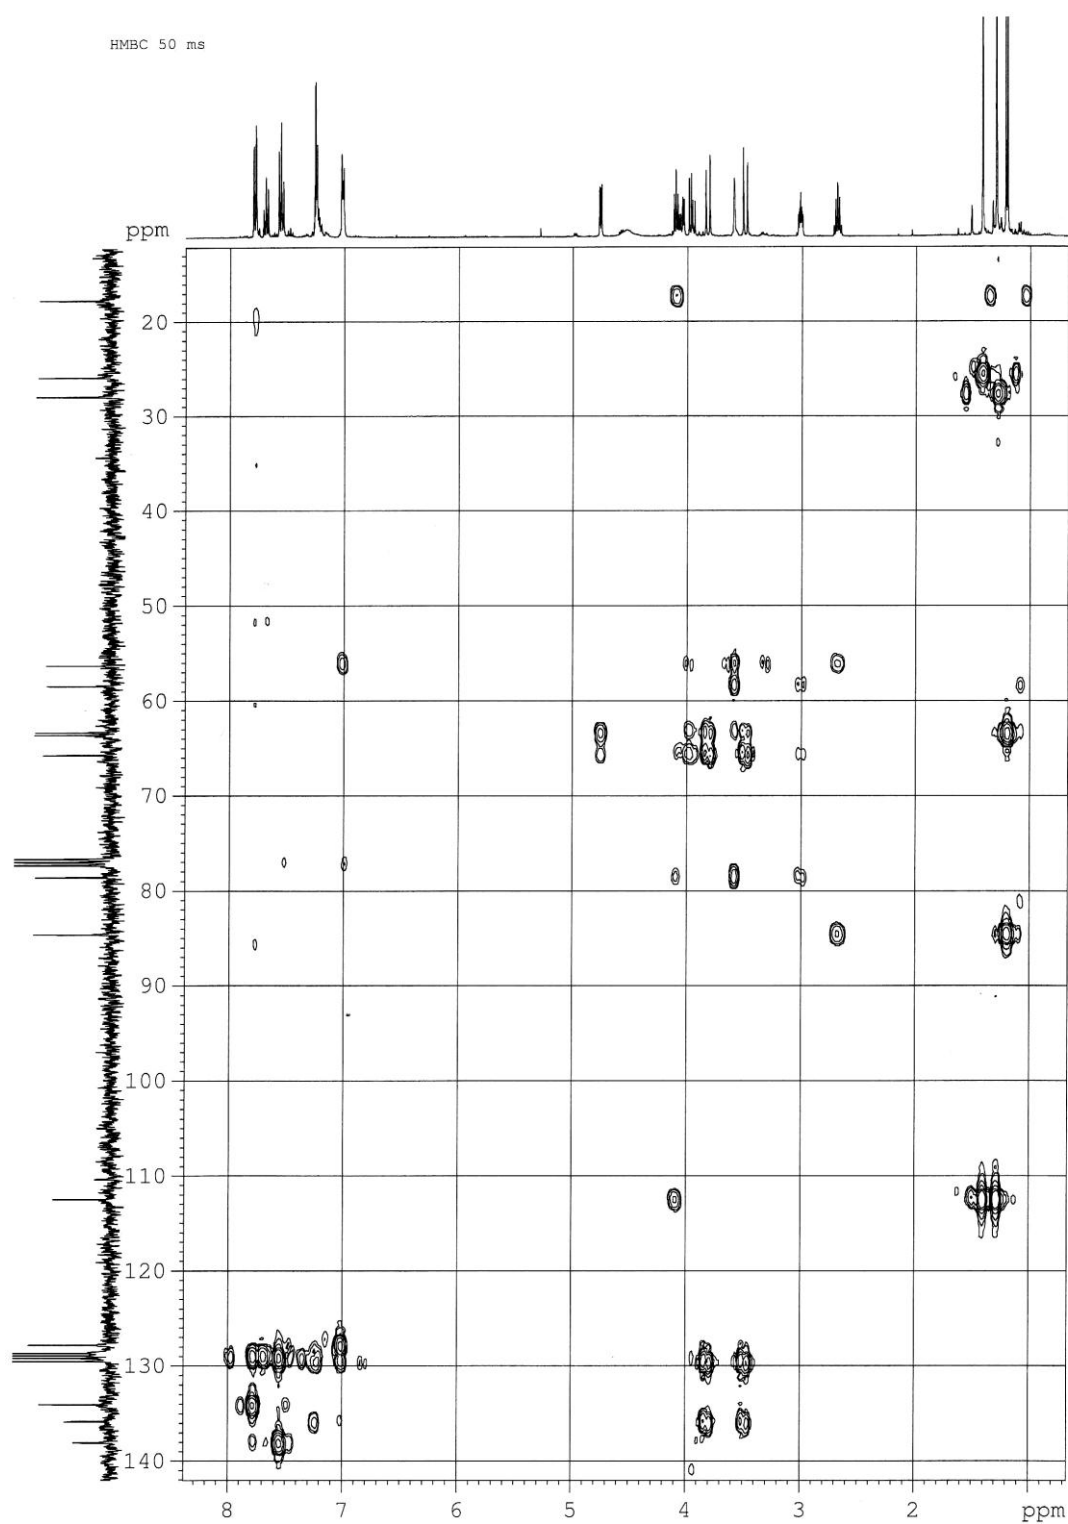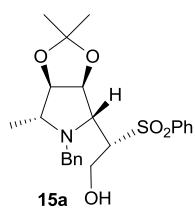

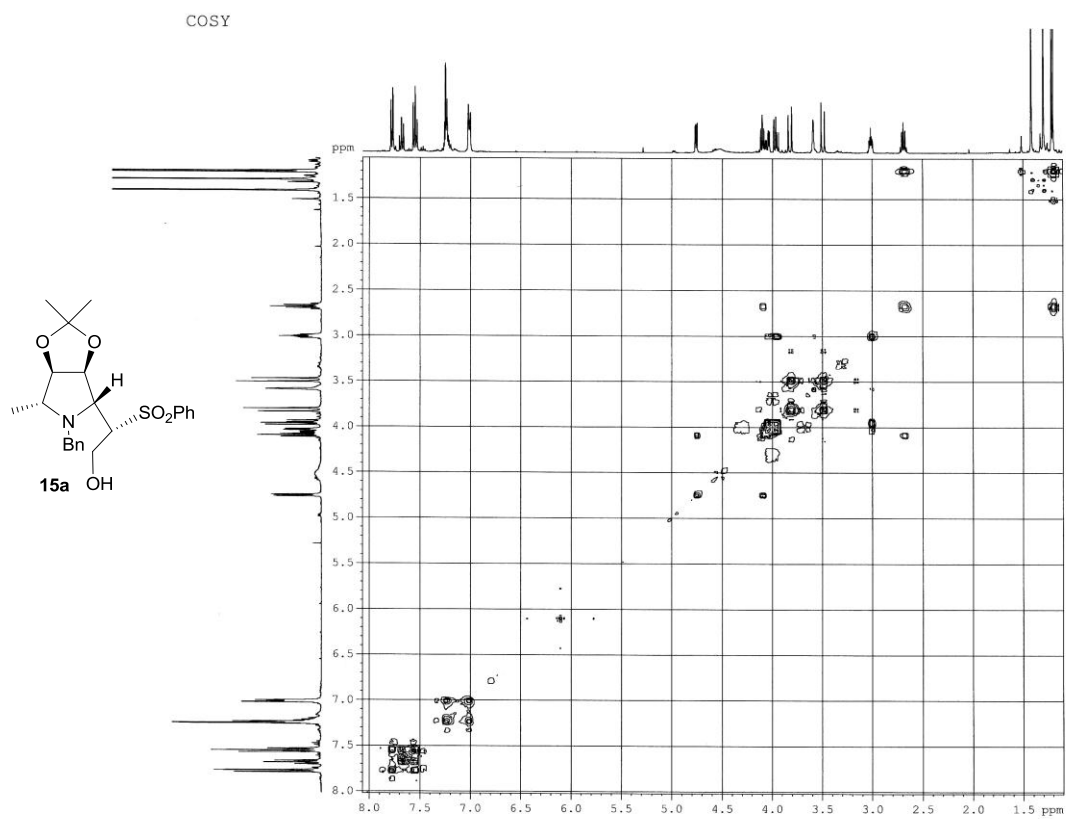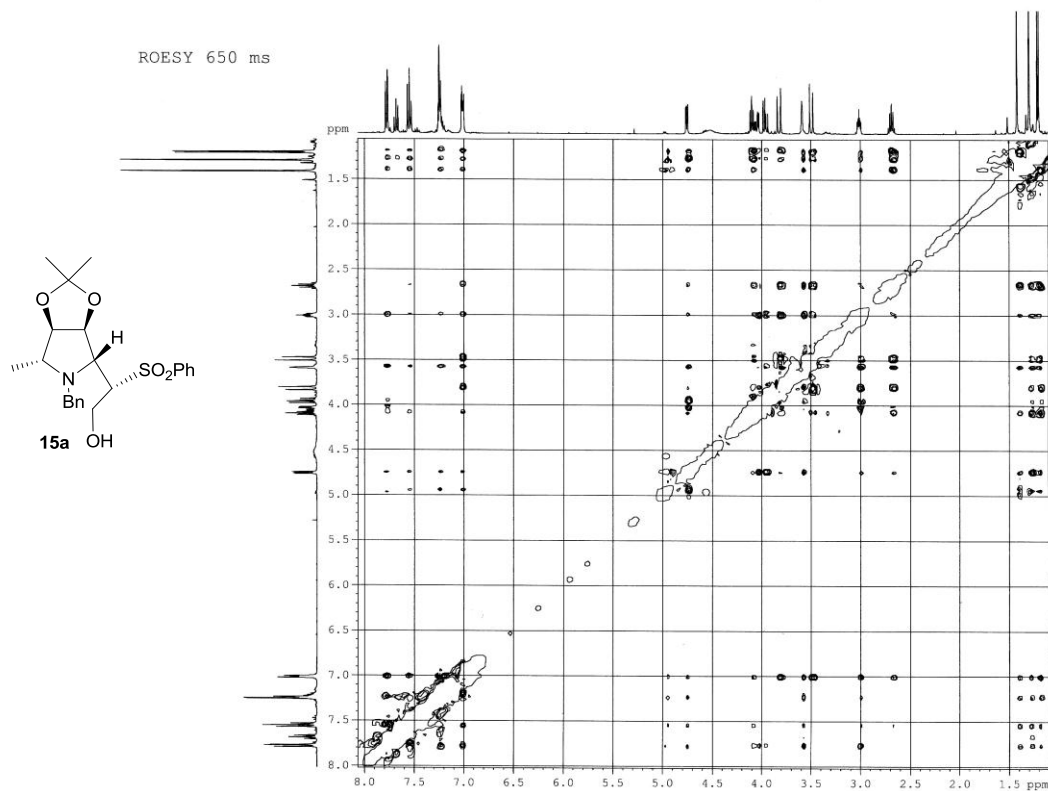

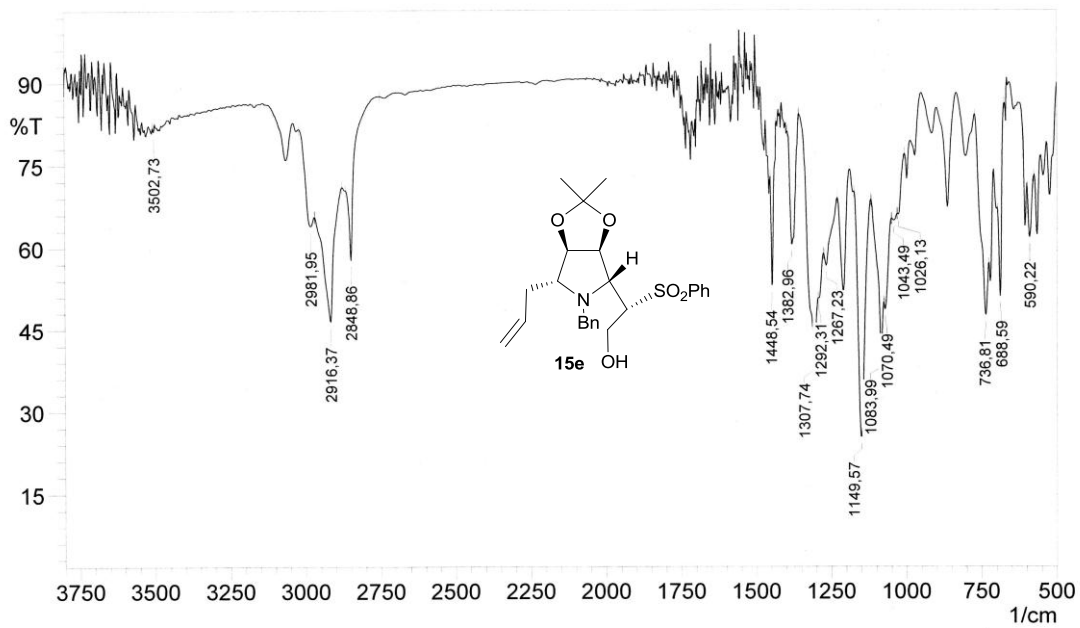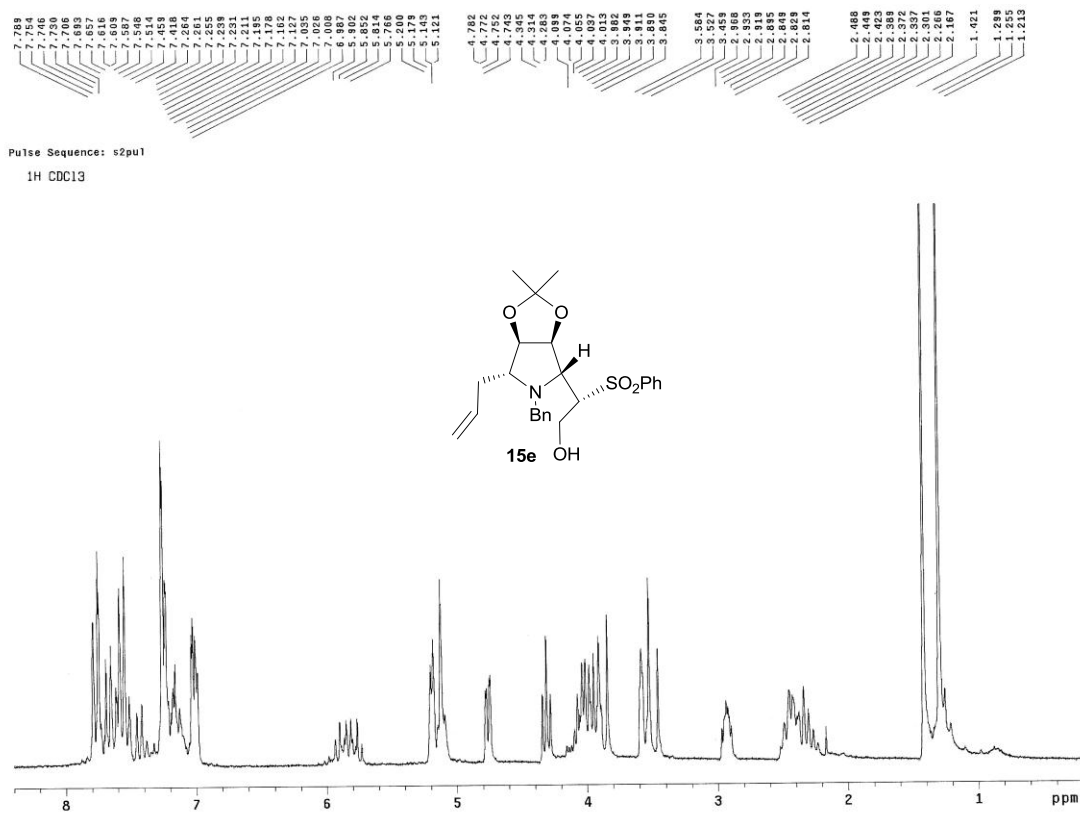

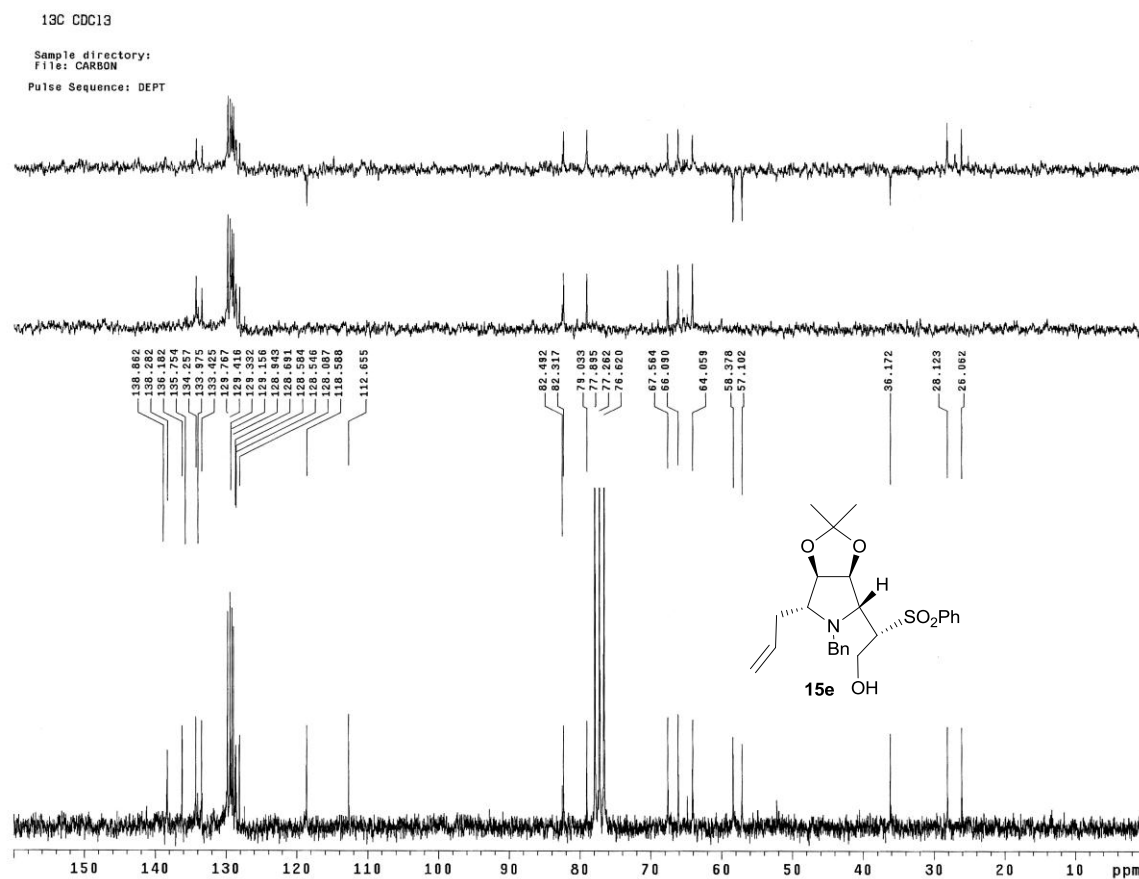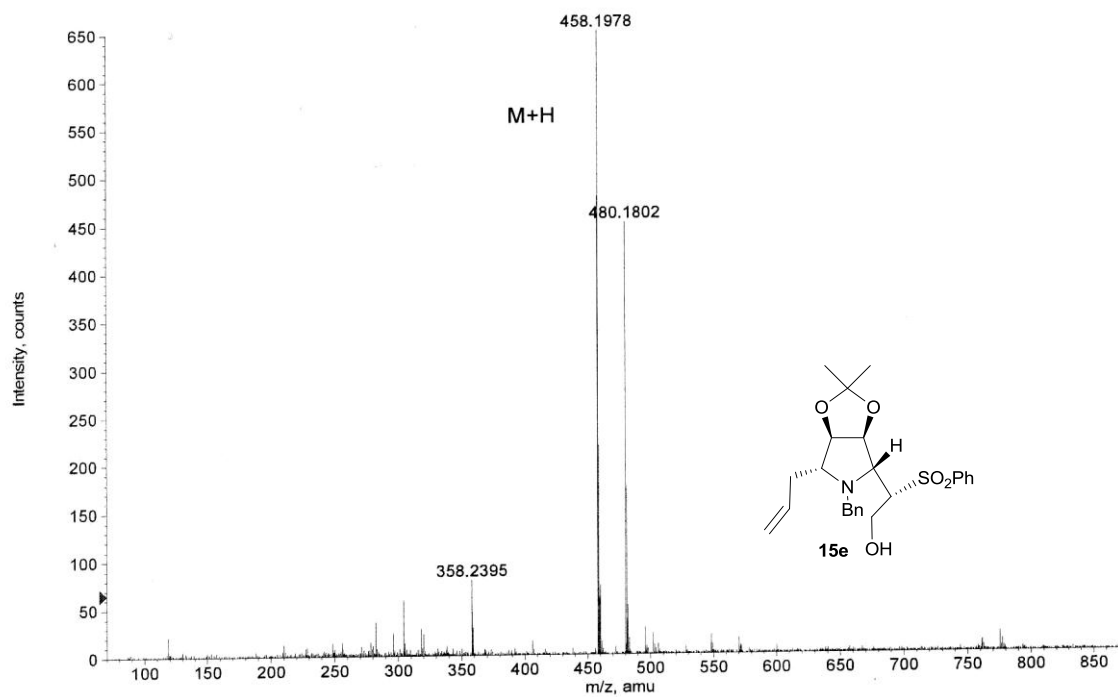

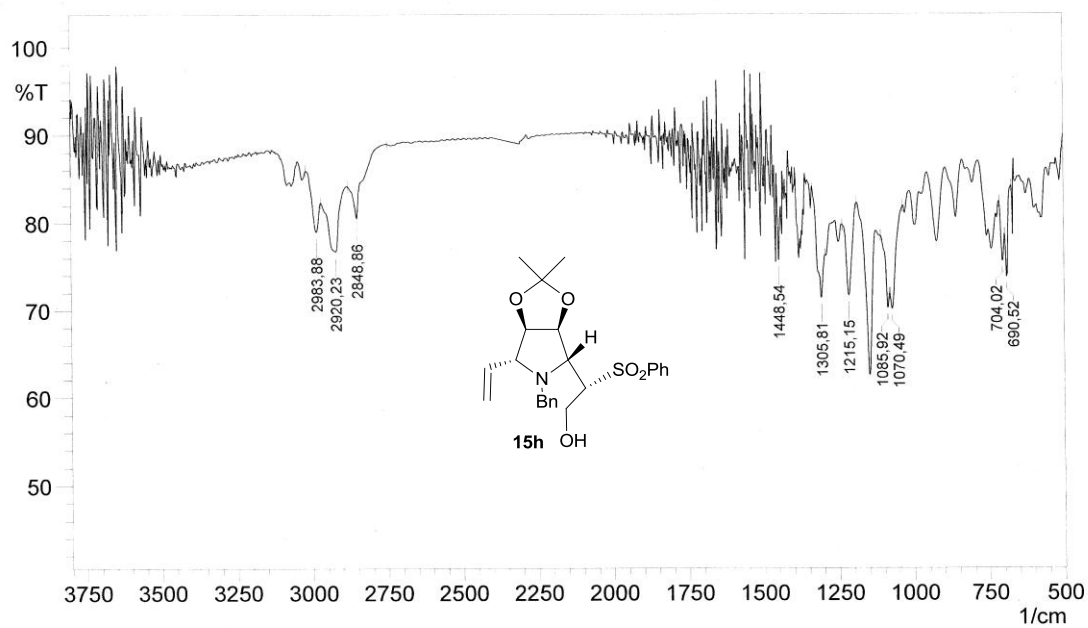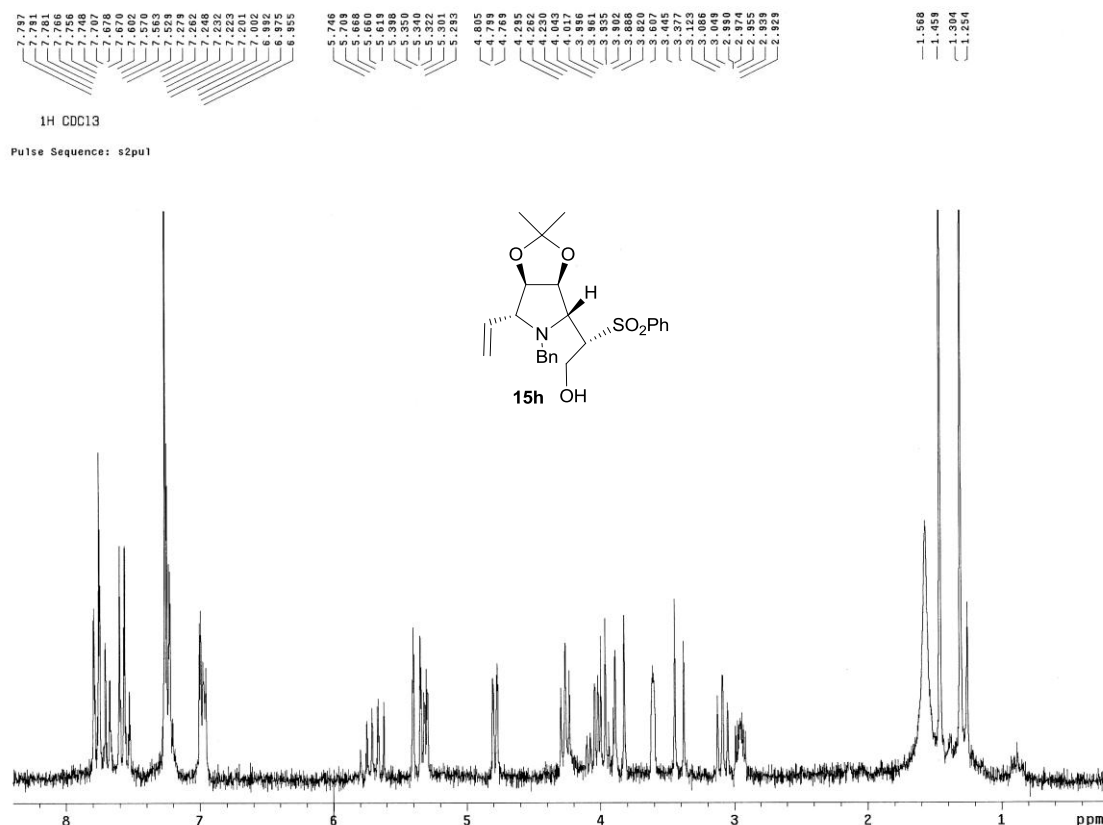

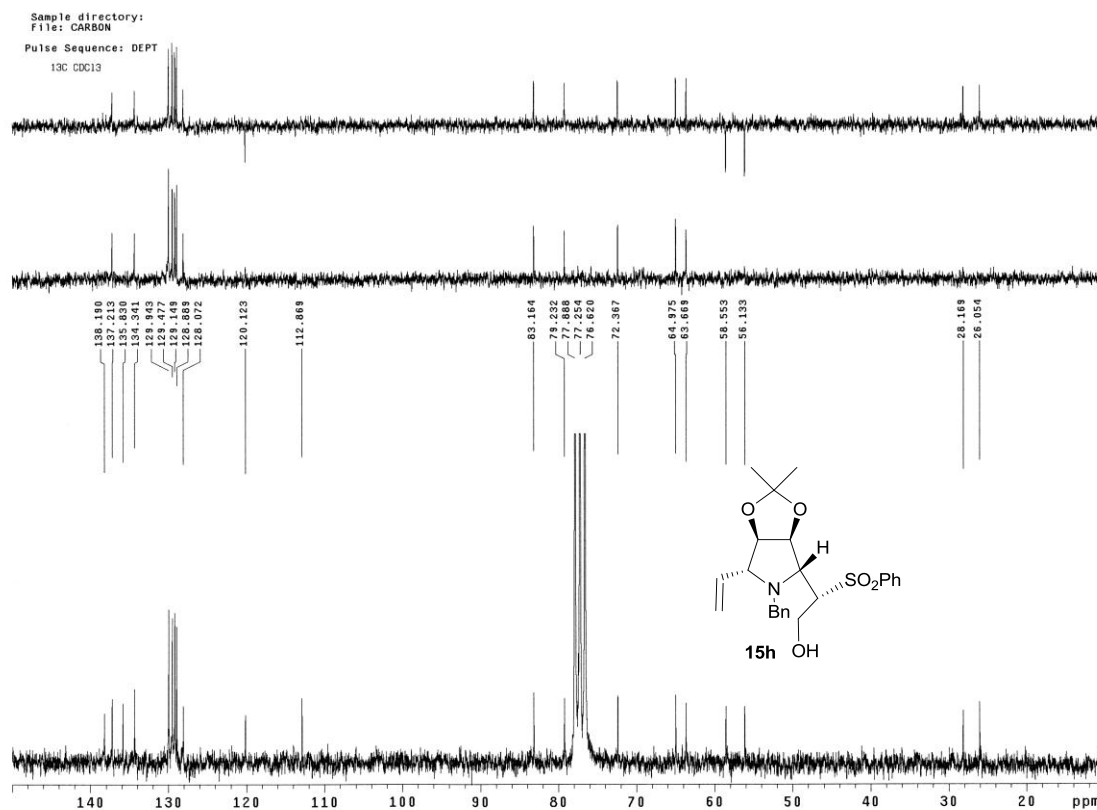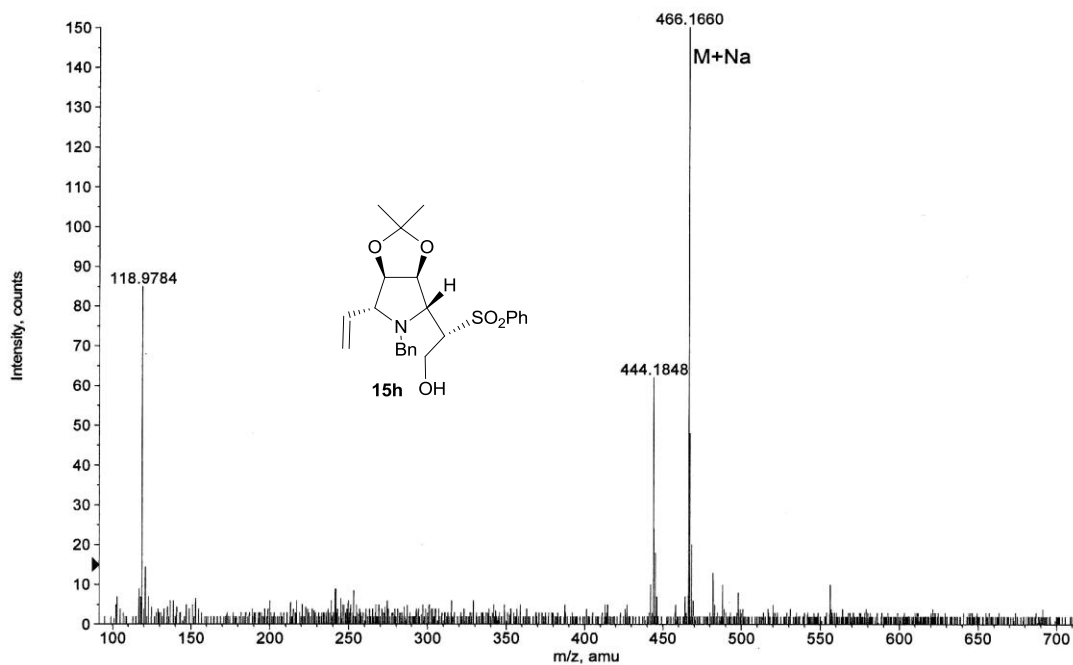

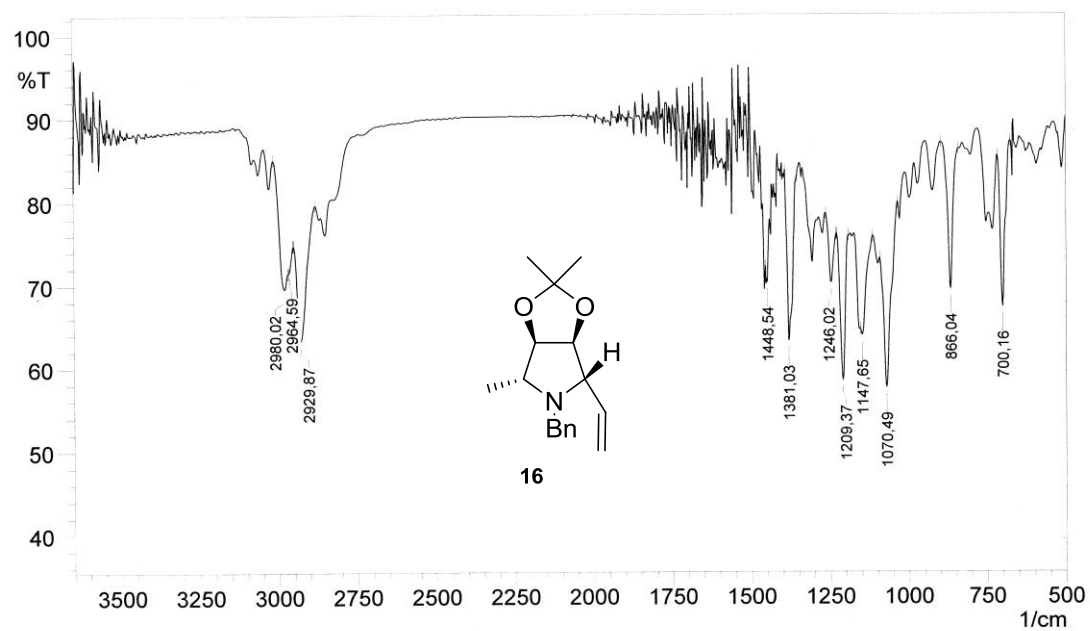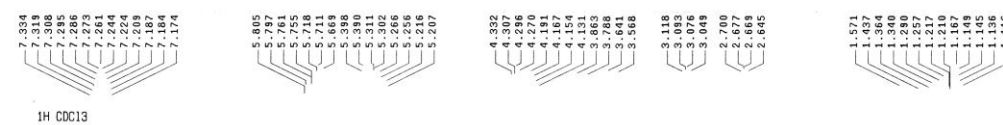

Pulse Sequence: s2pu1

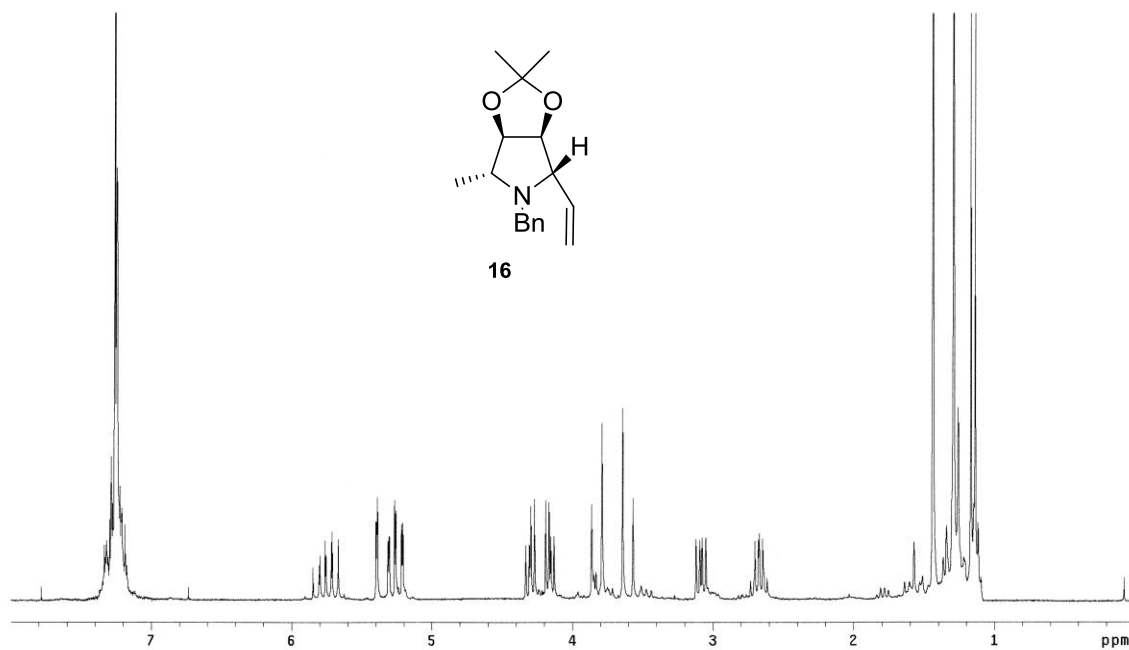

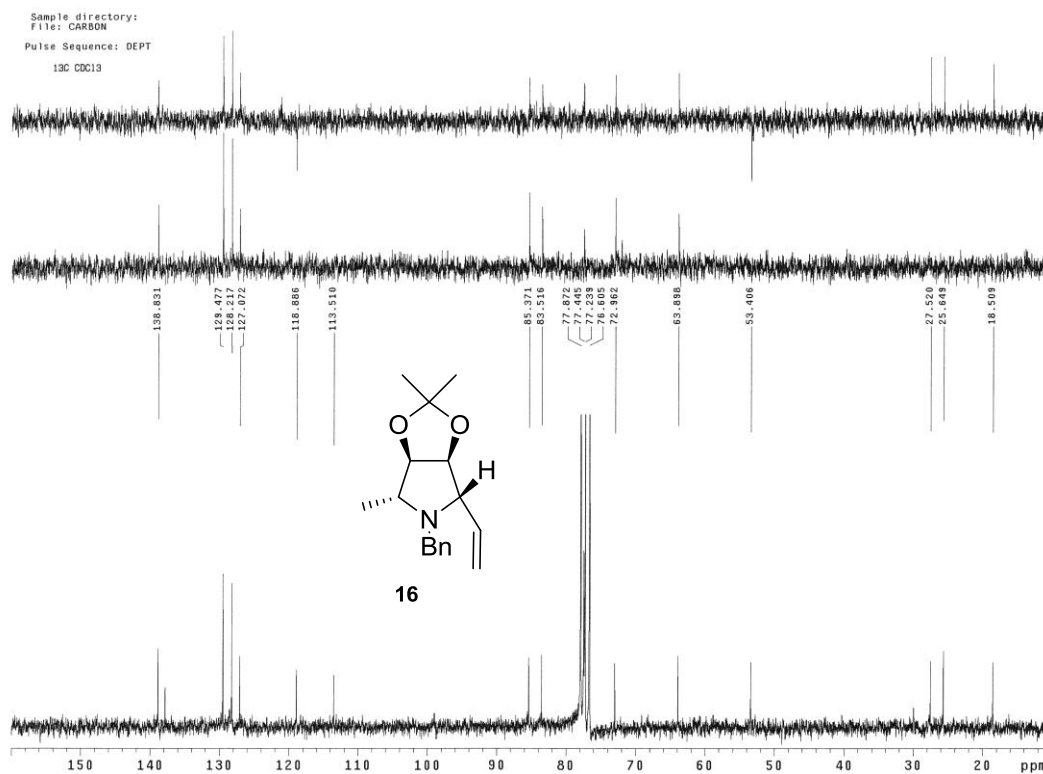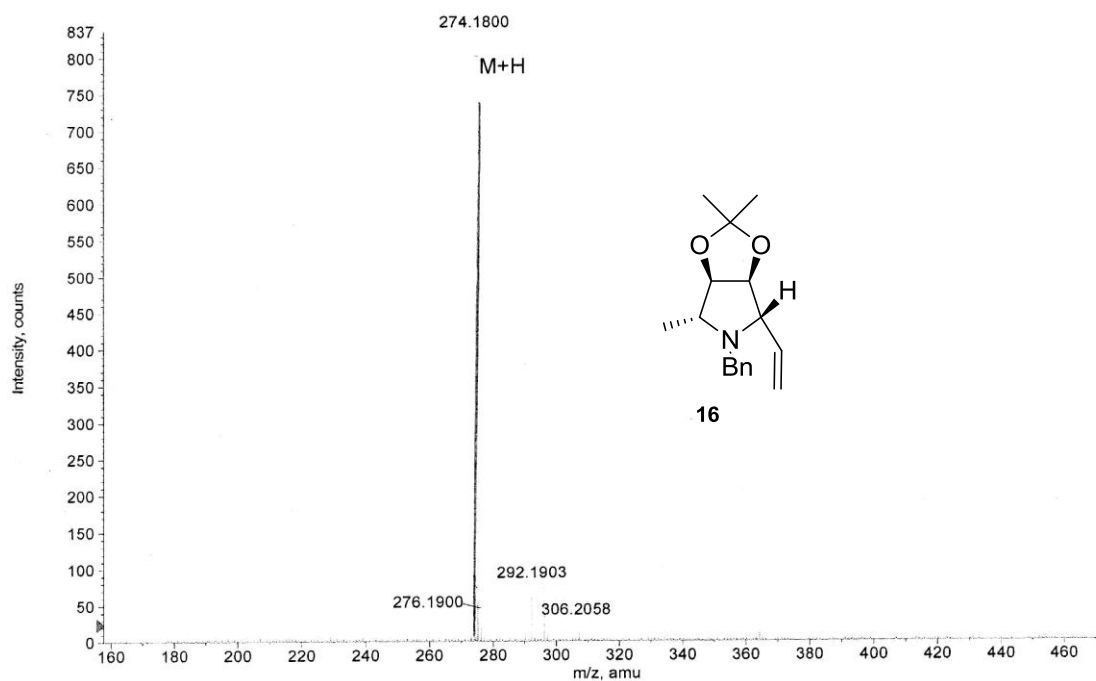

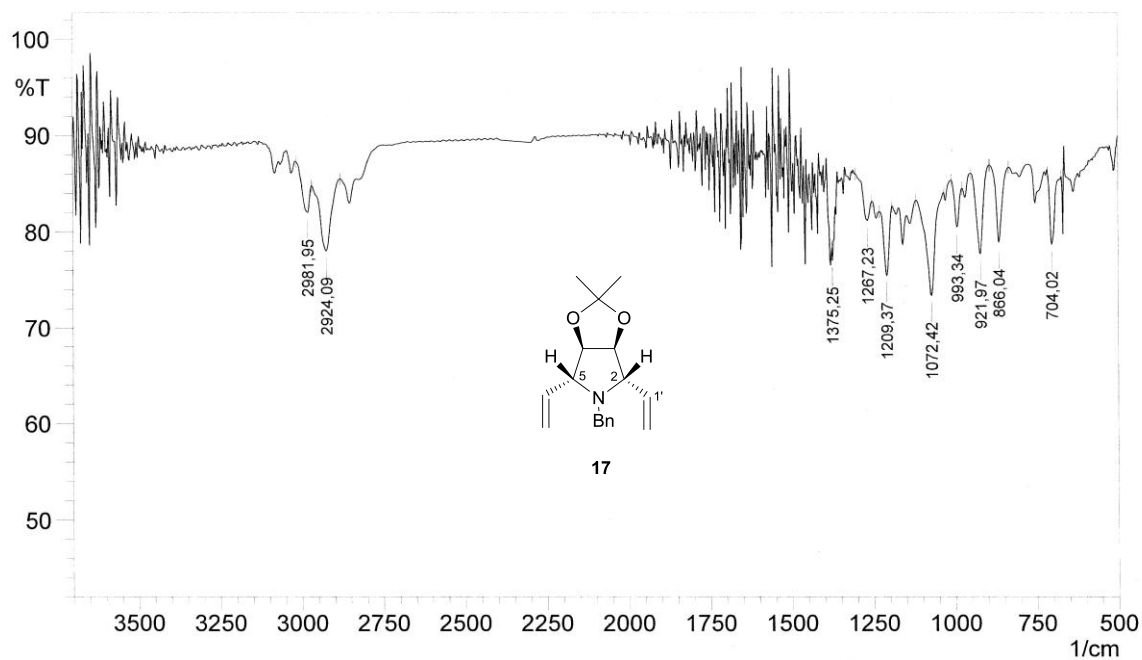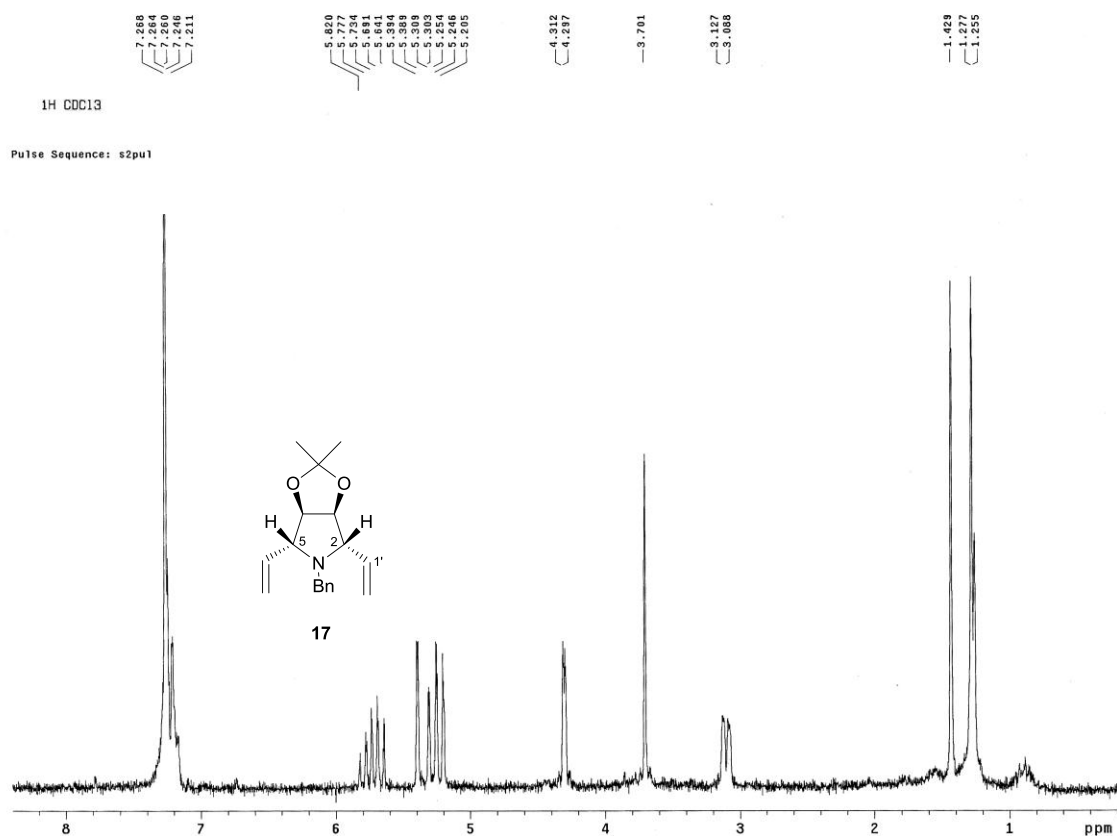

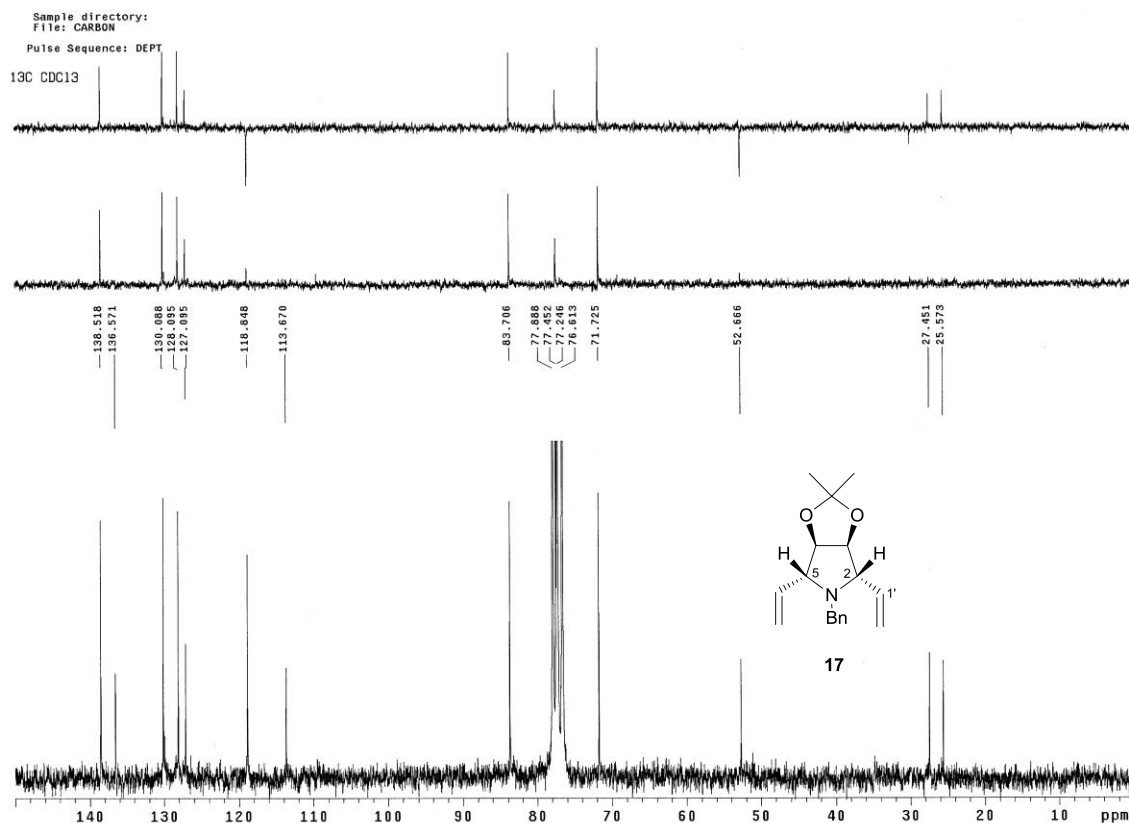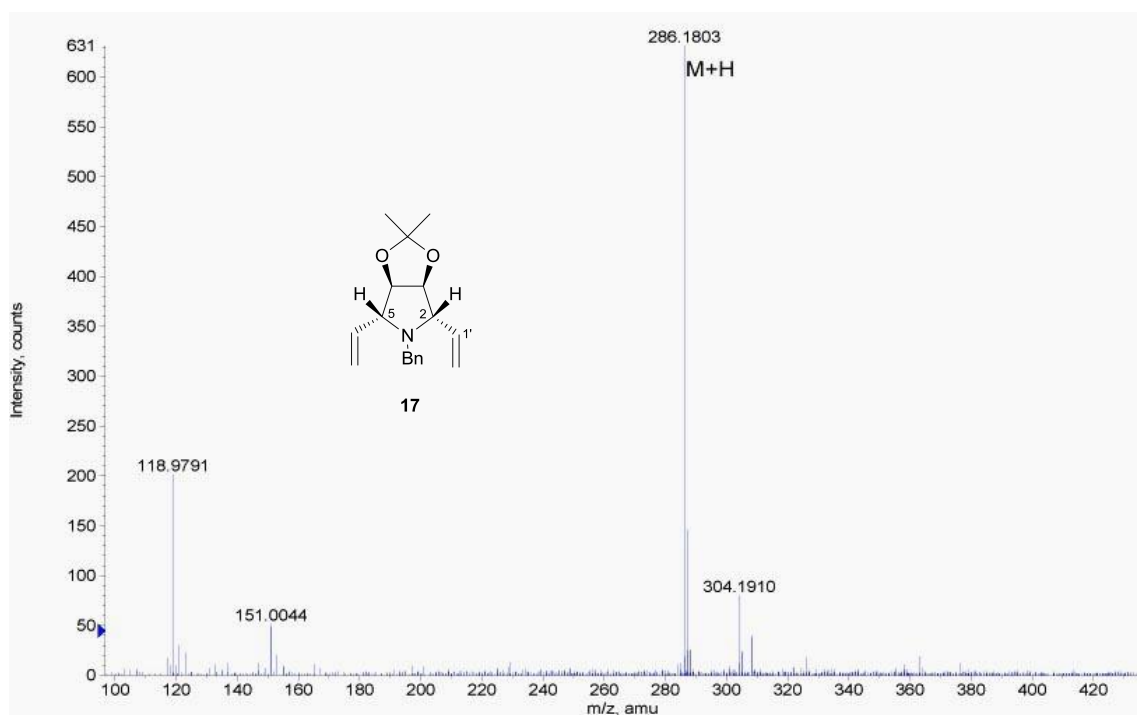

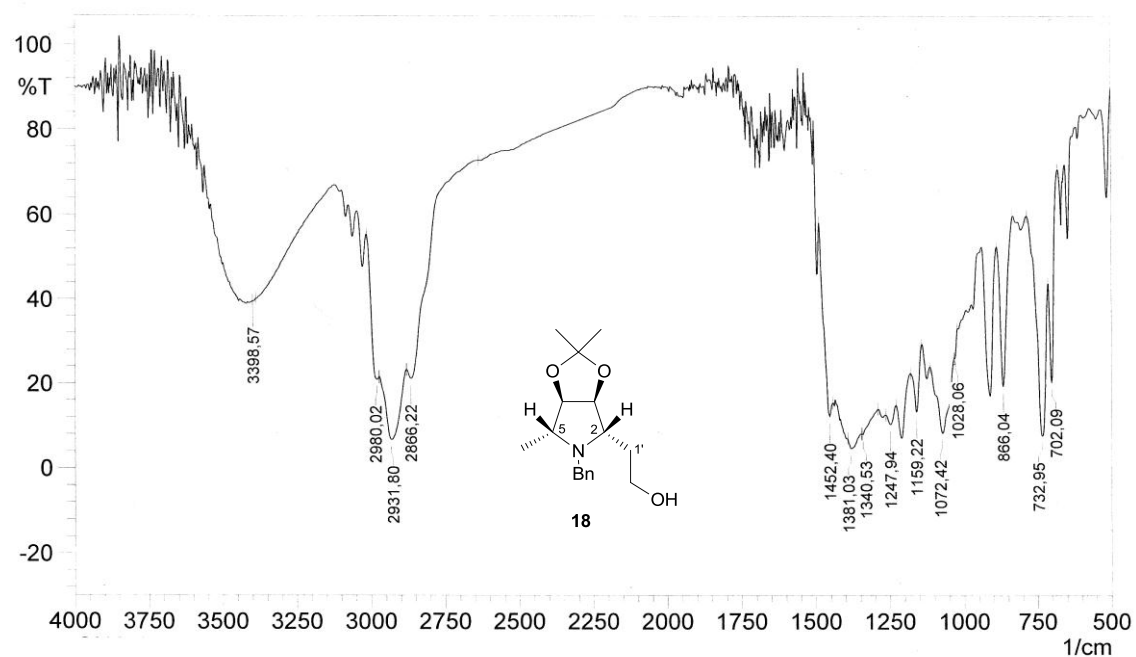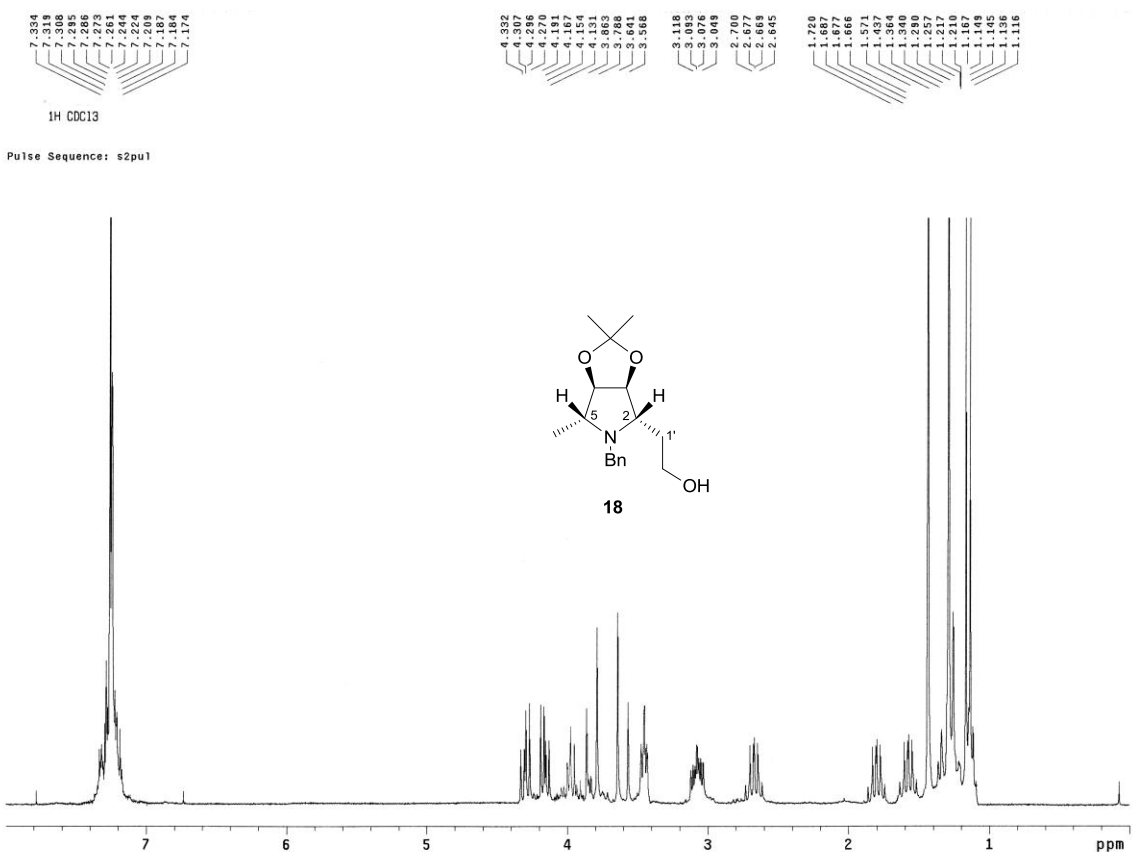

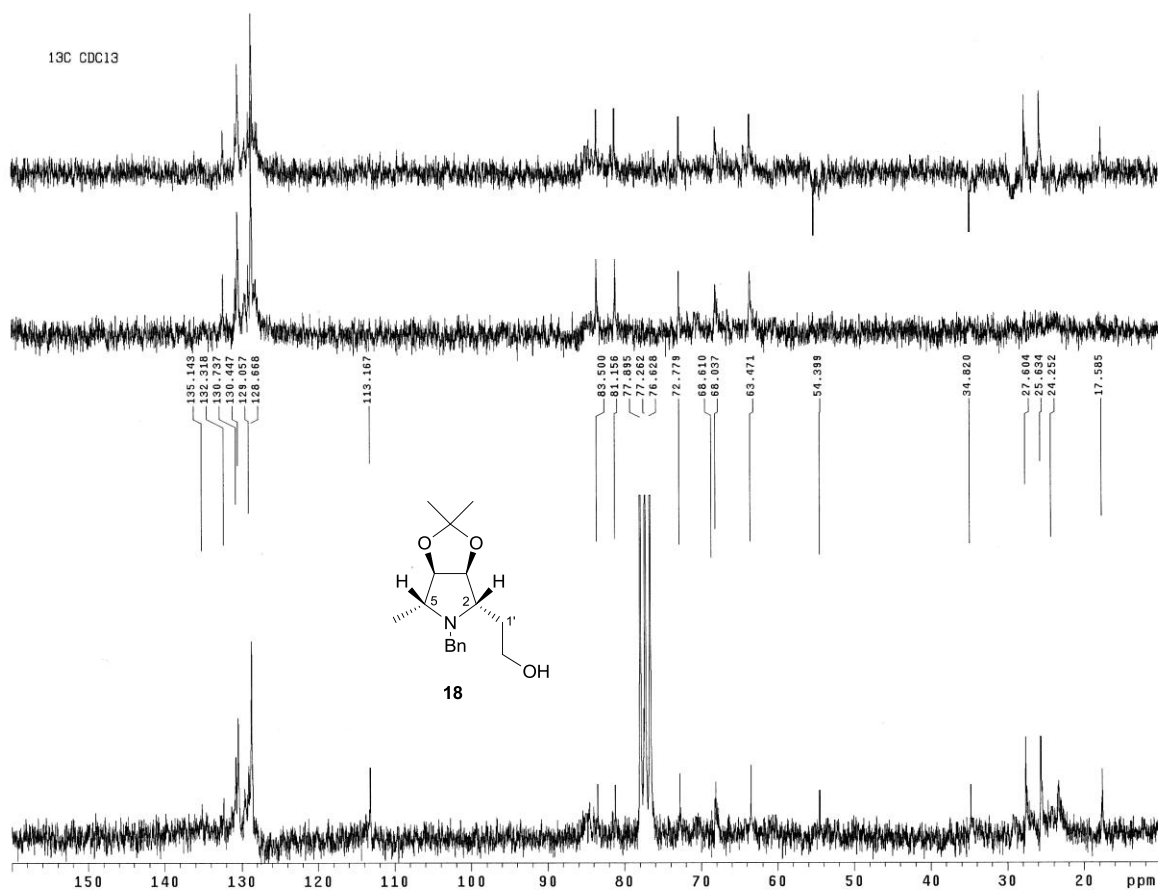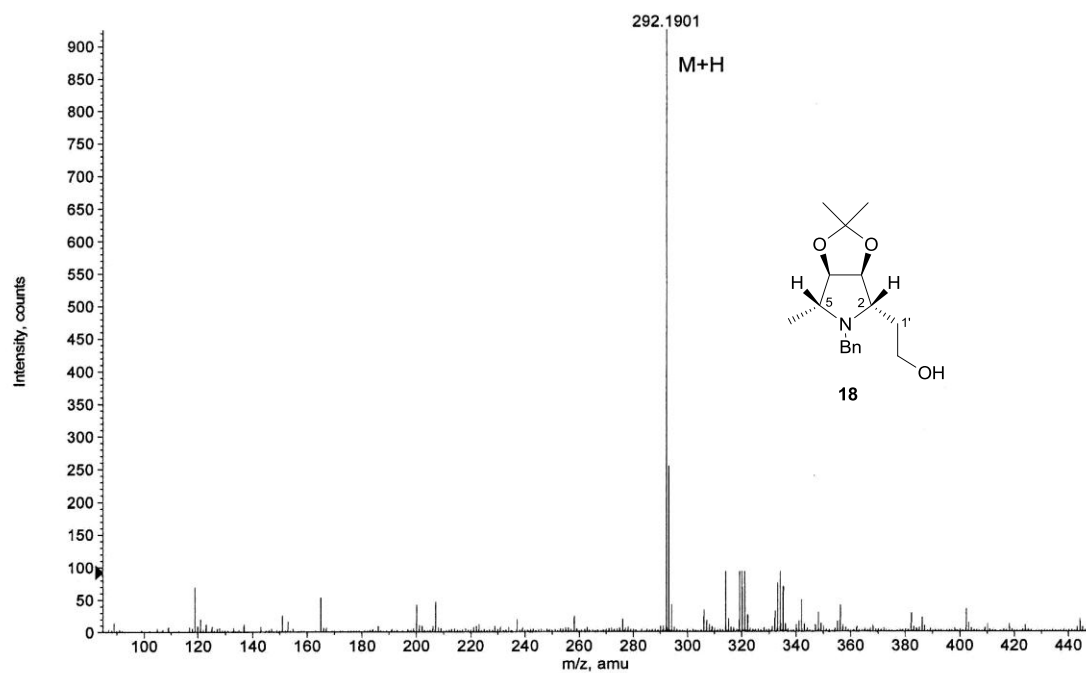

**Crystal data for 13a:**  $C_{22}H_{25}NO_5S$ ,  $CH_2Cl_2$ ,  $M = 500.42$ , monoclinic, space group  $P2_1$ ,  $a = 6.0659(2)$  Å,  $b = 15.5656(6)$  Å,  $c = 12.9608(5)$  Å,  $\alpha = \gamma = 90^\circ$ ,  $\beta = 99.791(3)^\circ$ ,  $V = 1205.93(8)$  Å<sup>3</sup>,  $Z = 2$ ,  $D_c = 1.378$  Mg/m<sup>3</sup>,  $\mu(\text{Cu-K}\alpha) = 3.521$  mm<sup>-1</sup>,  $F(000) = 524$ . 6938 reflections were collected at  $4.48 \leq 2\theta \leq 67.01$  and merged to give 3318 unique reflections ( $R_{\text{int}} = 0.0254$ ), of which 3132 with  $I > 2 \sigma(I)$  were considered to be observed. Final values are  $R_1 = 0.0379$ ,  $wR_2 = 0.1017$ ,  $\text{GOF} = 1.039$ , max/min residual electron density 0.355 and -0.352 e. Å<sup>-3</sup>. A suitable single crystal of the **13a** compound was mounted on glass fibre for data collection on a Bruker Kappa APEX II CCD (charge coupled device) diffractometer. Data were collected at 298 K using Cu K $\alpha$  radiation ( $\lambda = 1.54178$  Å) and  $\omega$  scan technique, and were corrected for Lorentz and polarization effects. Structure solution, refinement and data output were carried out with the SHELXTL<sup>TM</sup> program package. The structure was solved by direct methods combined with difference Fourier synthesis and refined by full-matrix least-squares procedures, with anisotropic thermal parameters in the last cycles of refinement for all non-hydrogen atoms. Hydrogen atom positions were calculated by geometrical methods and refined as a riding model. CCDC 888605. See [https://www.ccdc.cam.ac.uk/services/structure\\_deposit/](https://www.ccdc.cam.ac.uk/services/structure_deposit/) for crystallographic data in .cif or other electronic format.

#### ORTEP of 13a.

The crystal contains an unique molecule of **13a** compound and a molecule of solvent in the asymmetric unit. The title compound consists of a pyrrolidine-oxazine bicyclic ring with an isopropylidenedioxy group, a benzyl group and a phenylsulfone group as substituents. All the bond lengths and angles are within the normal ranges. The C-S-C and O-S-O angles are  $104.7(1)^\circ$  and  $118.2(2)^\circ$ , respectively. The large O-S-O angle and its deviation from the optimal  $109.5^\circ$  angle can be explained by the repulsion of the lone pairs of the oxygen placing the oxygen atoms as far away from each other as possible and thus minimizing the C-S-C angle. The molecule is twisted at the C-S bond being the C13-C7-S1-C6 torsion angle of  $155.6(2)^\circ$ .

In the crystal structure, each solvent molecule is involved in two type of intermolecular C-H...O and C-H...Cl interactions with different molecule of **13a** compound, which lead to infinite molecular chains running along [010] directions (Fig. 1). The first one occurs between the carbon atom (C8) of the oxazine group and the chlorine atom (Cl1) with  $d(\text{C8-H8}\cdots\text{Cl1}) = 3.590(4)$  Å and  $\angle \text{C8-H8}\cdots\text{Cl1} = 134.7(2)^\circ$ . The other exists between the carbon atom of solvent and the oxygen atom (O5) of the isopropylidenedioxy group with  $d(\text{C23-H23}\cdots\text{O5}) = 3.363(6)$  Å and  $\angle \text{C8-H8}\cdots\text{Cl1} = 157.1(3)^\circ$ . A view of intermolecular C-H...O (dotted light blue lines) and C-H...Cl (dotted violet lines) interactions is shown in Fig. 2.

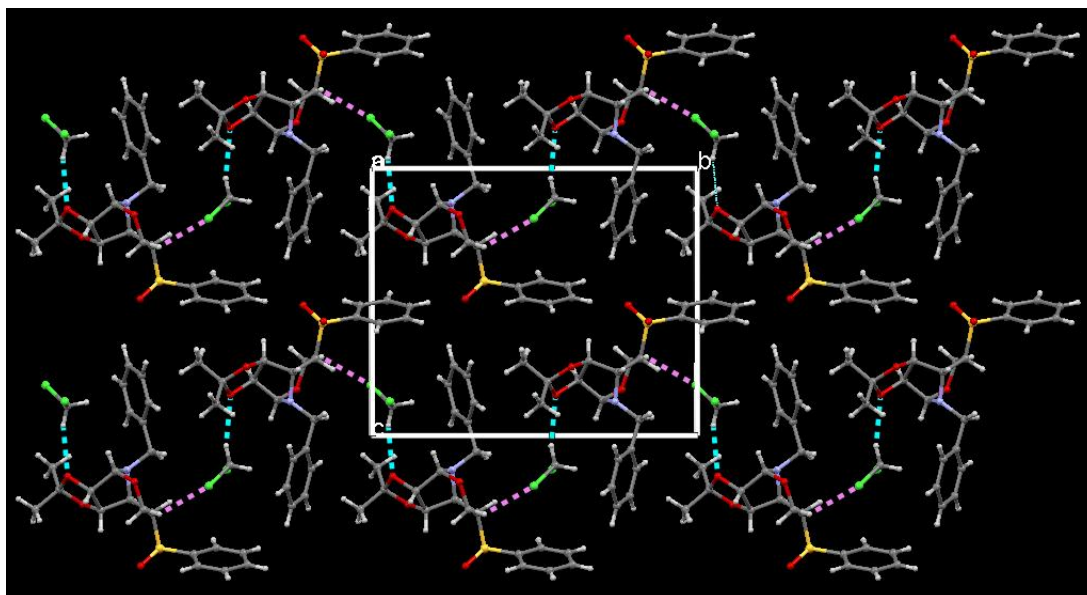

**Fig. 1** Crystal packing of 13a-view along a-axis, showing intermolecular hydrogen bonding.

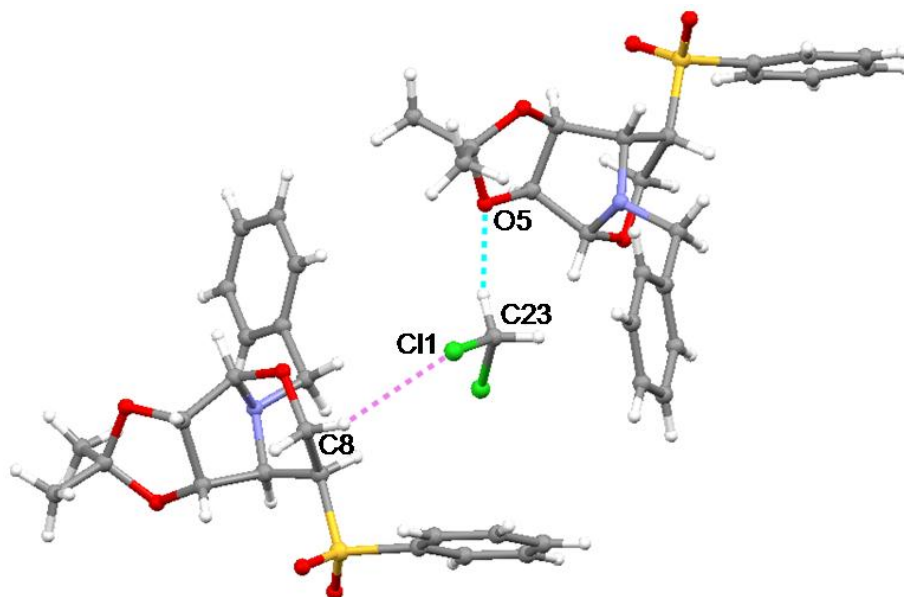

**Fig. 2** Perspective view of intermolecular interactions for **13a**

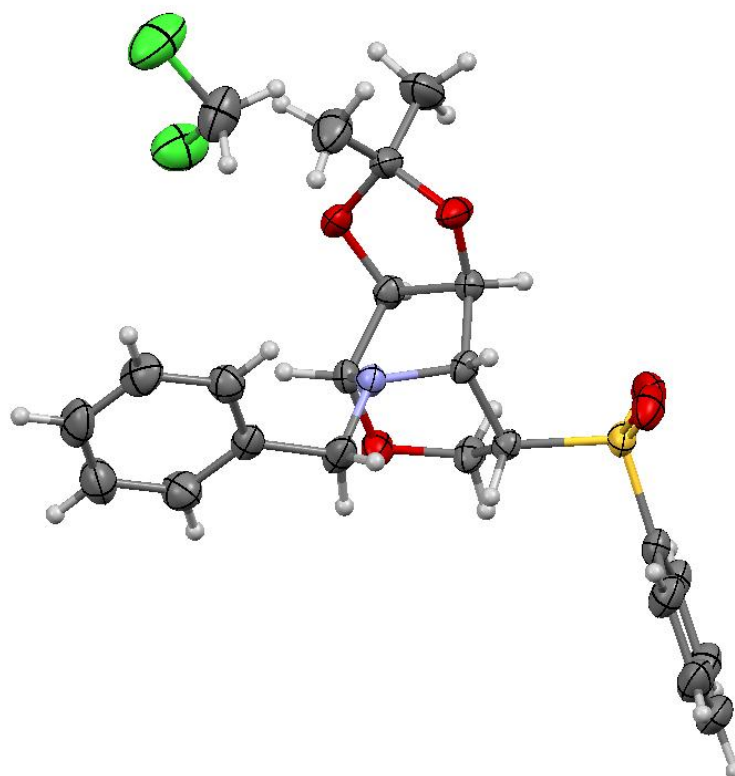

**Fig. 3** X-ray crystal structure of **13a** compound. Displacement ellipsoids are drawn at the 30 % probability level. Hydrogen atoms are shown as spheres of arbitrary radius.
